# Supplementary material for: Pathway and Network Analyses Identify Growth Factor Signaling and MMP9 as Potential Mediators of Mitochondrial Dysfunction in Severe COVID-19
Source: MDPI journal article supplement (doi:10.3390/ijms24032524), 2023-01-28
Supplement: s1 [file s1]

**Supplementary Figure S1. Principal Component Analysis (PCA) of all coding genes.** PCA plot of PC1 and PC2 showing levels of healthy controls (HC), mild/moderate (MldMod) and severe (Svre) COVID-19 cases by different colours. PCA was generated from normalized rlog data. Note that this analysis and the results are very similar to our previous study ("Blood transcriptome responses in patients correlate with severity of COVID-19 disease" 10.3389/fimmu.2022.1043219. Accepted but not yet available at PubMed) with a slightly different sample selection (here, we did not include multiple samples from the same patient).

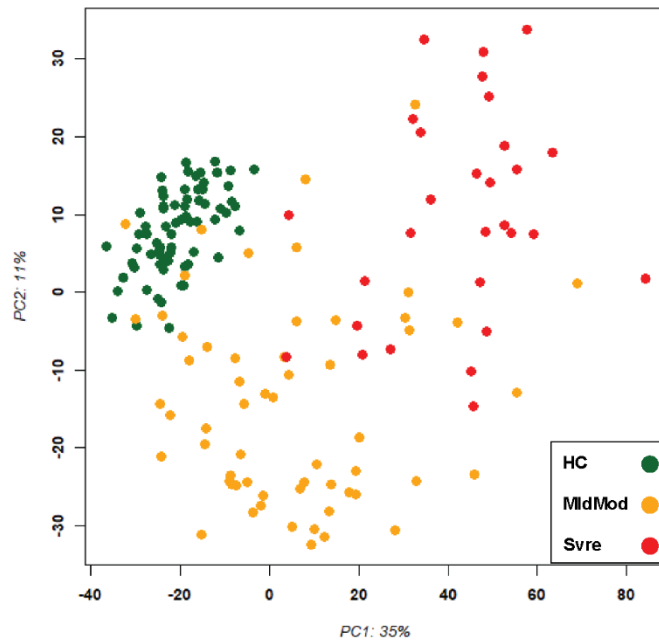

**Supplementary Figure S2. Deconvolution analysis of all coding genes.** Mean values for mild/moderate, severe, and healthy control groups were calculated and subjected to a deconvolution analysis. Deconvolution was performed with the package immunedeconv (version 2.0.4) [1] using the method mcp\_counter [2]. Y-axis: severity categories, X-axis: scores from mcp\_counter analysis for the different cell populations. HC: healthy controls; mld\_mod: mild and moderate; svre: severe. This analysis revealed a slight increase in endothelial cell and neutrophil in the mild/moderate cases compared to the healthy controls. A much stronger increase was observed in the severe cases. Conversely, for B, T, and dendritic cells, a slight decrease was observed for the mild/moderate cases compared to healthy controls whereas a strong decrease was evident in the severe cases compared to either healthy controls or mild/moderate cases. For macrophage/monocyte and NK cells, an increase in their relative abundance was observed in the mild/moderate cases compared to the healthy controls and a strong reduction in the severe cases compared to both the health controls and the mild/moderate cases. Note that this analysis and the results are very similar to our previous study ("Blood transcriptome responses in patients correlate with severity of COVID-19 disease" 10.3389/fimmu.2022.1043219. Accepted but not yet available at PubMed) with a slightly different sample selection (here, we did not include multiple samples from the same patient).

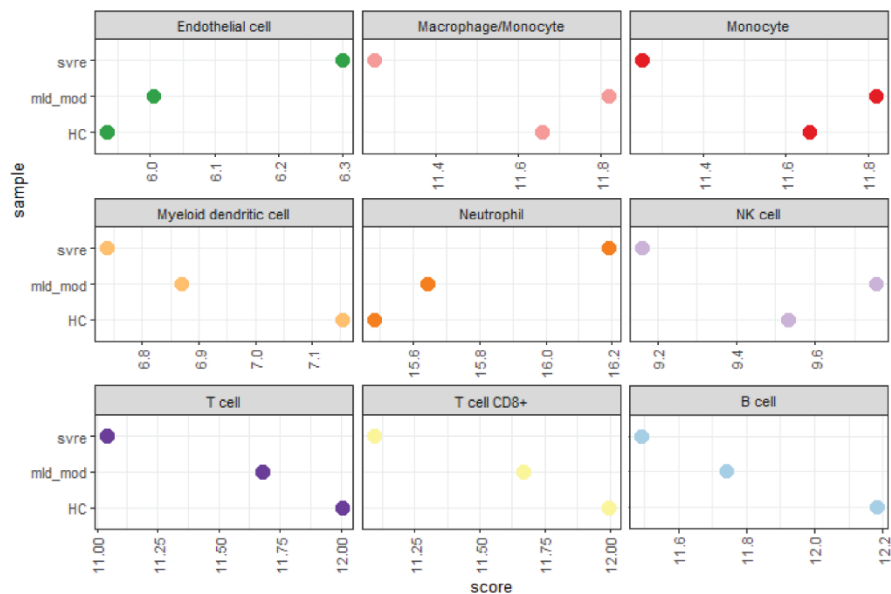

**Supplementary Figure S3. Functional analysis of mitochondria specific DEGs.** Functional analysis using GO term enrichment for DEGs from the contrast of mild/moderate versus severe cases. Pathway association analysis was performed with the package clusterProfiler [3] **(A)** up-regulated (higher in severe), **(B)** down-regulated (higher in mild/moderate).

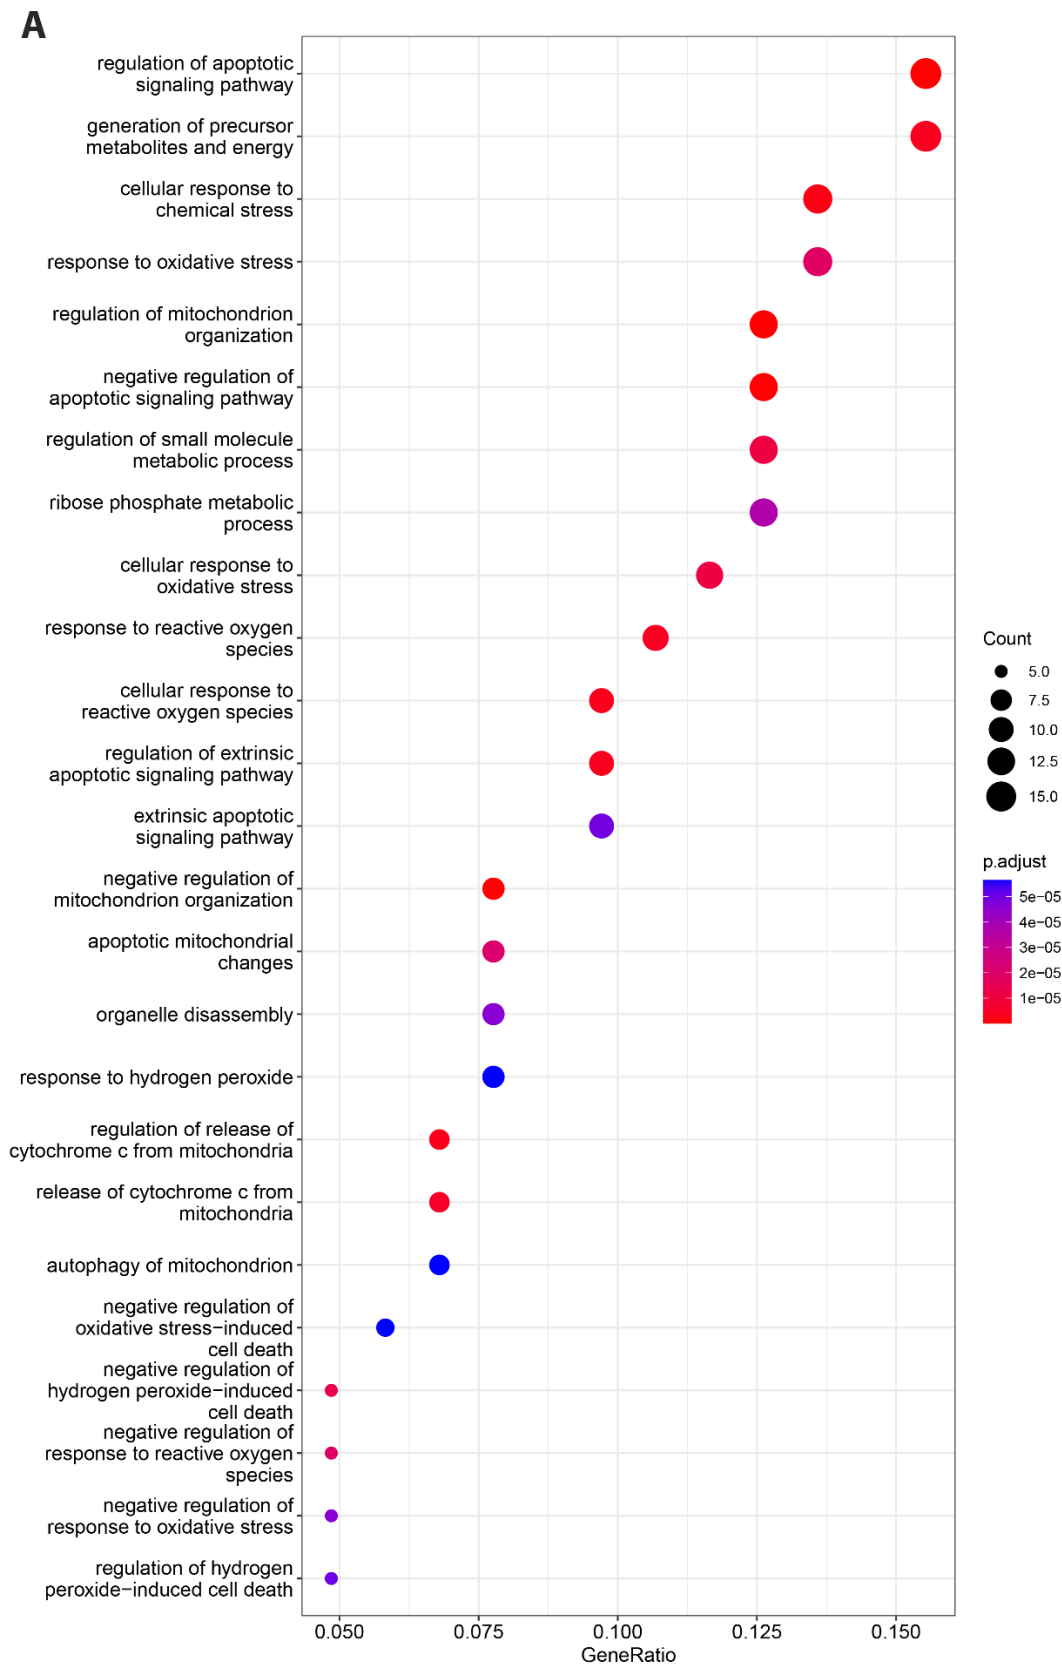

**B**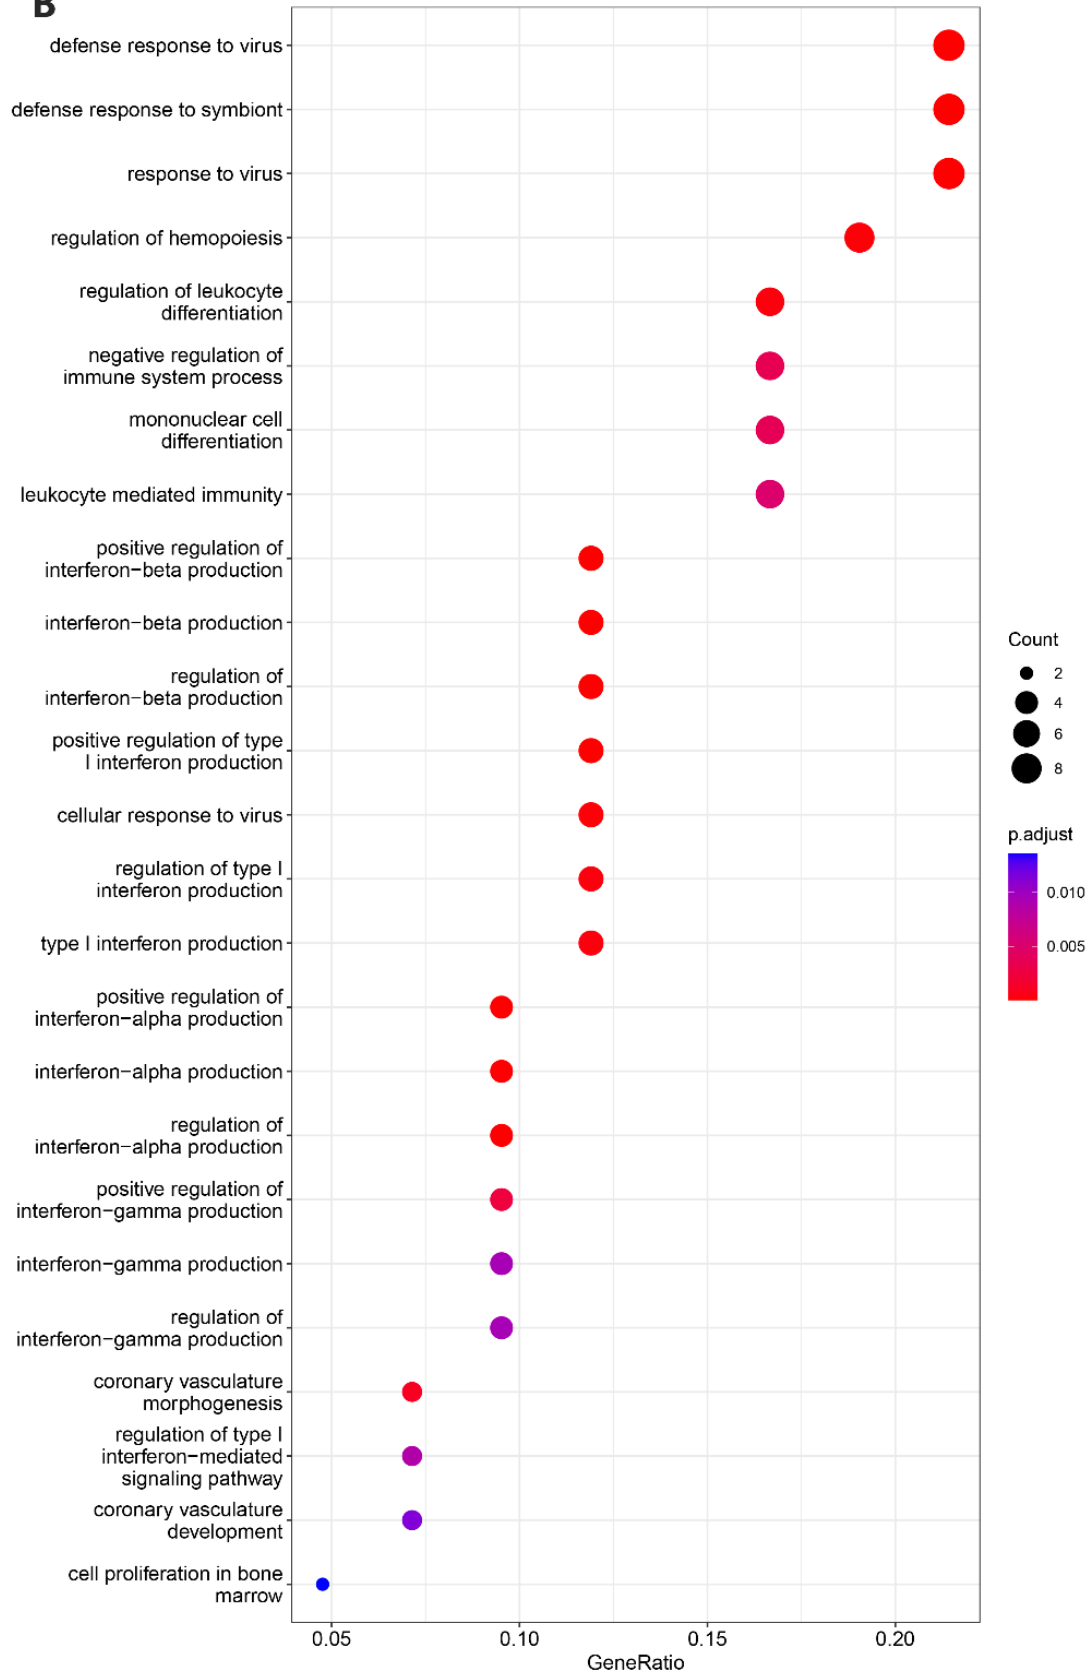

**Supplementary Figure S4. Metacore network analysis of genes from the enriched pathways.** (A) Bar diagram showing Log<sub>2</sub> Fold Change (LFC) of the genes that contribute to enrichment of the top 10 pathways from Figure 3D (Svre vs MldMod\_UP). Network analysis of the genes from six of the ten pathways (highlighted in red) were shown in (B) cell adhesion ECM remodelling (C) androgen signalling in HCC (D) IL-6 and endothelin-1-induced fibroblast/myofibroblast migration and ECM production in asthmatic airways (E) stromal-epithelial interaction in prostate cancer (F) cell cycle chromosome condensation in prometaphase (G) DNA damage ATM/ATR regulation of G2/M checkpoint: nuclear signalling. (H) Bar diagram showing Log<sub>2</sub> Fold Change (LFC) of the genes that contribute to enrichment of the top 10 pathways from Figure 3E (Svre vs MldMod\_DOWN). Network analysis of the genes from four of the ten pathways (highlighted in blue) were shown in (I) COVID-19: immune dysregulation (J) COVID-19: regulation of antiviral response by SARS-CoV-2 (K) glomerular injury in lupus nephritis (L) dual function of Treg cells in cancer (M) MAPK-independent proliferation of normal and asthmatic smooth muscle cells (N) CD8<sup>+</sup> Tc1 cells in allergic contact dermatitis. Red and blue circles denote upregulated and downregulated genes from the respective enriched pathway. The coloured solid line with arrows represents activation (green), inhibition (red) and unspecified (grey) effects between the two genes. Bold light green lines represent well-known canonical pathways. Abbreviations: E stands for extracellular space; PM stands for plasma membrane; C stands for cytosol; N stands for nucleus.

A\_Svre vs MldMod\_UP

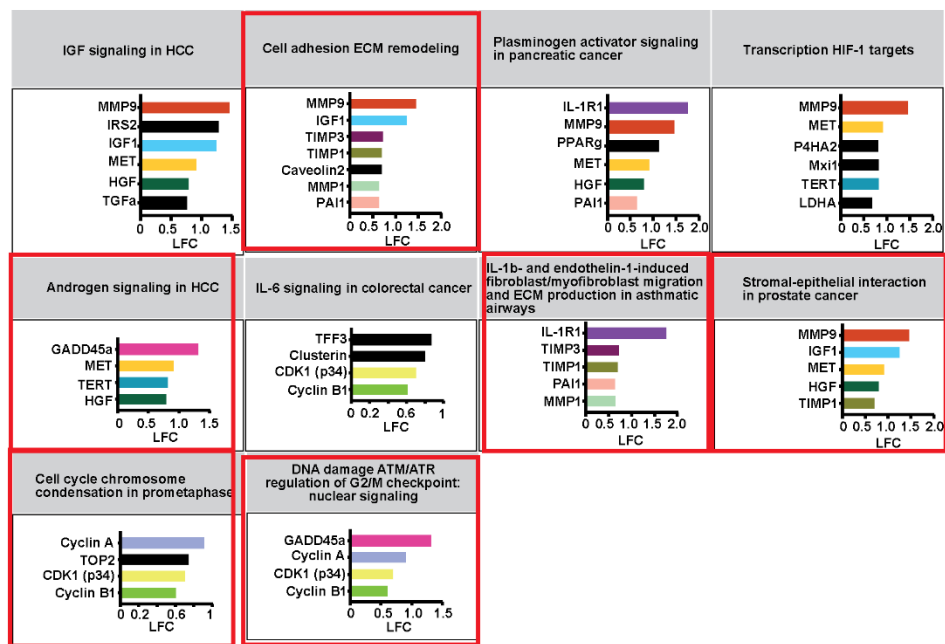

B\_Cell adhesion ECM remodelling

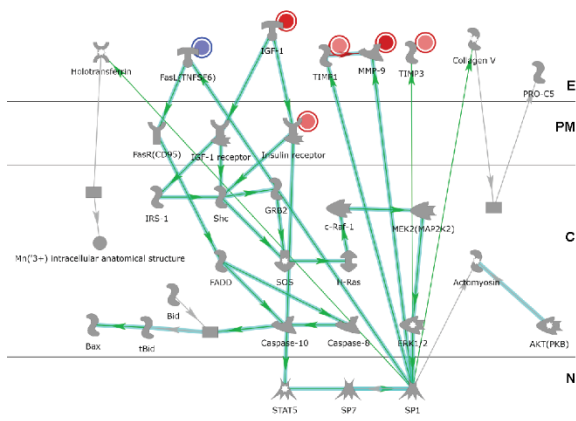

C\_Androgen signalling in HCC

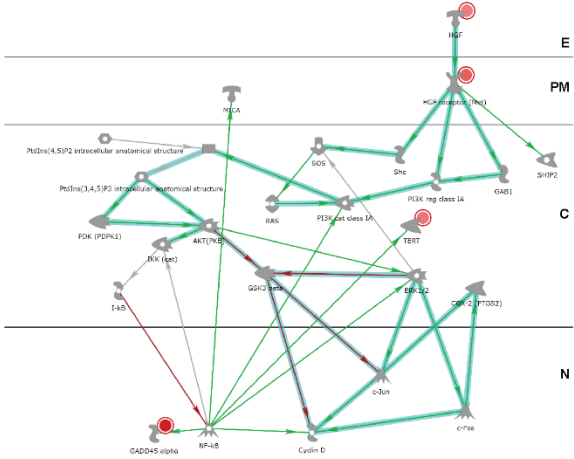

D\_IL-b- and endothelin-1-induced fibroblast/myofibroblast migration and ECM production in asthmatic airways

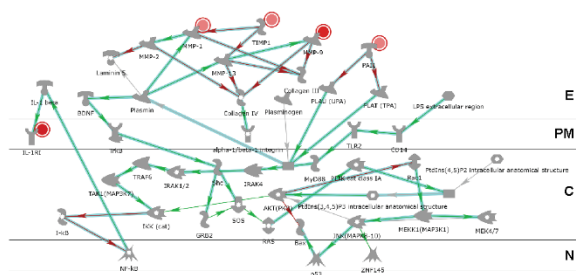

E\_Stromal-epithelial interaction in prostate cancer

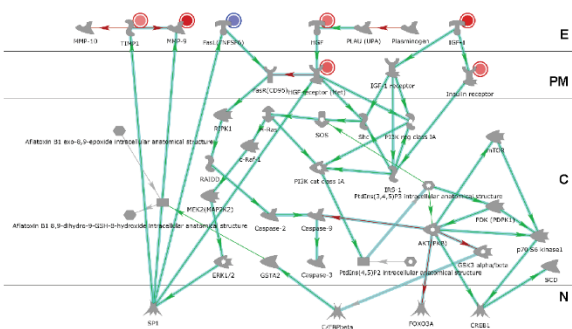

## F\_Cell cycle chromosome condensation in prometaphase

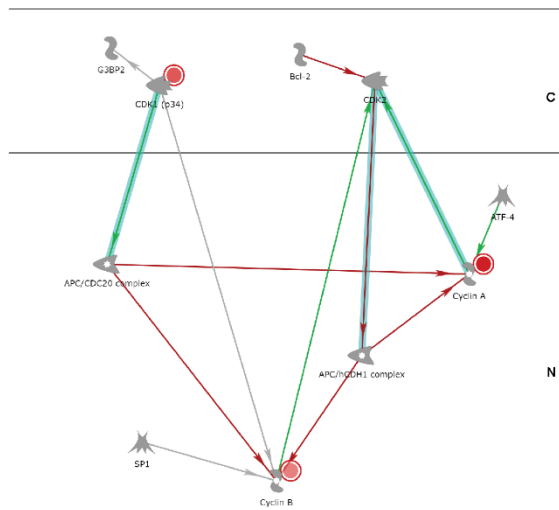

## G\_DNA damage ATM/ATR regulation of G2/M checkpoint: nuclear signalling

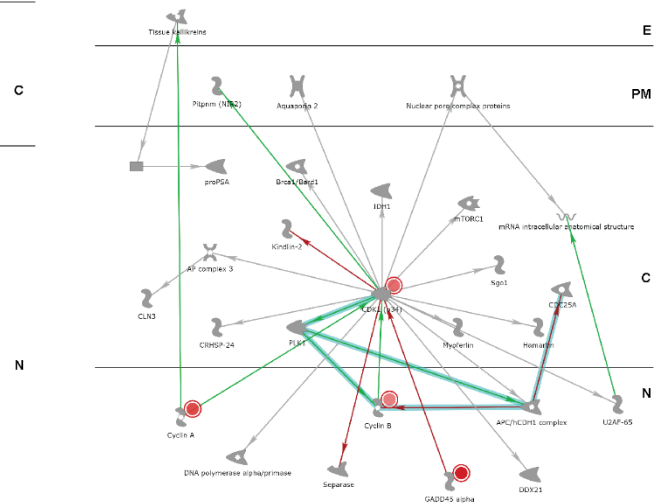

## H\_Svre vs MidMod\_DOWN

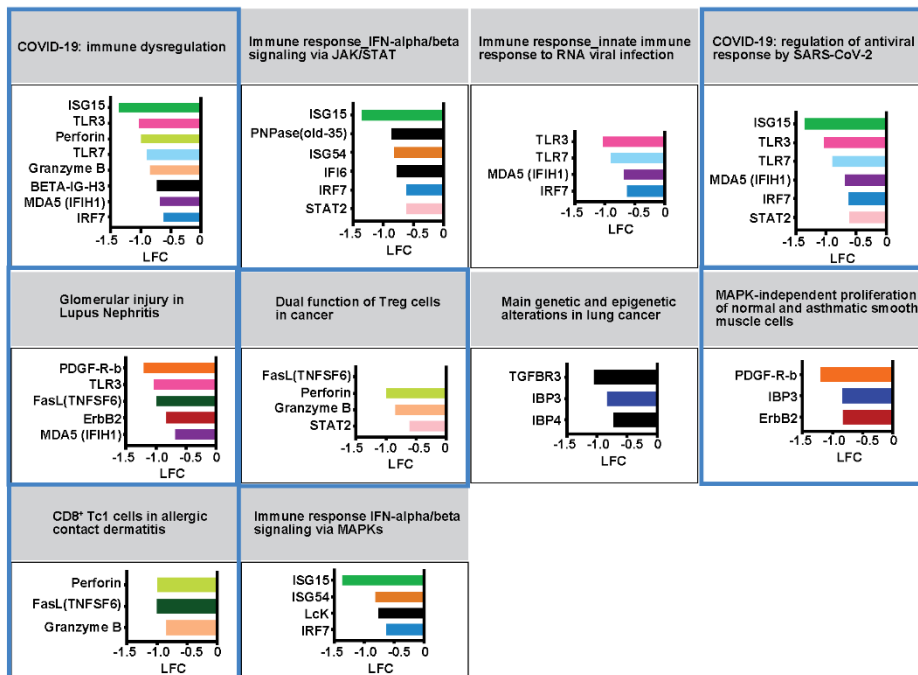

## I\_COVID-19: immune dysregulation

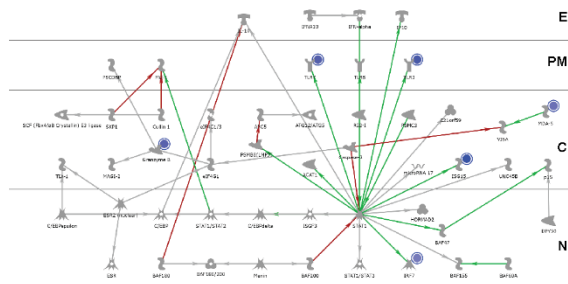

## J\_COVID-19: regulation of antiviral response by SARS-CoV-2

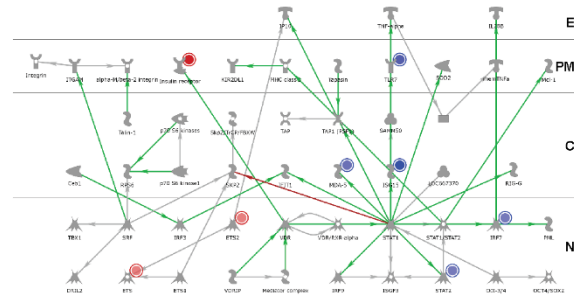

## K\_Glomerular injury in lupus nephritis

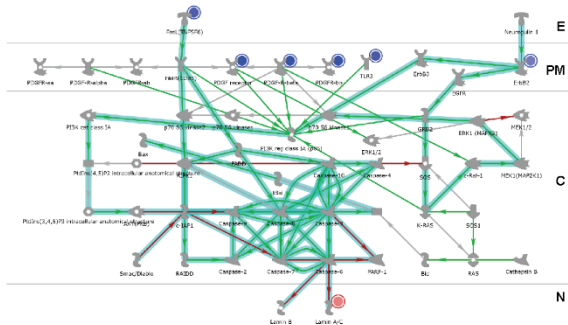

## L\_Dual function of Treg cells in cancer

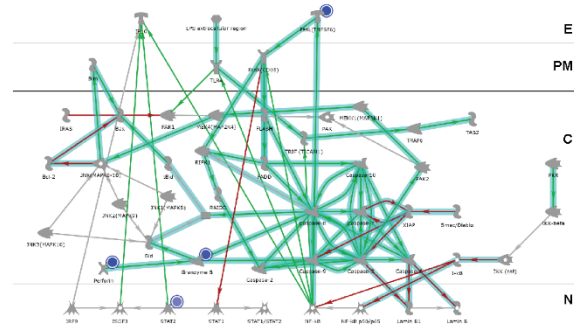

## M\_MAPK-independent proliferation of normal and asthmatic smooth muscle cells

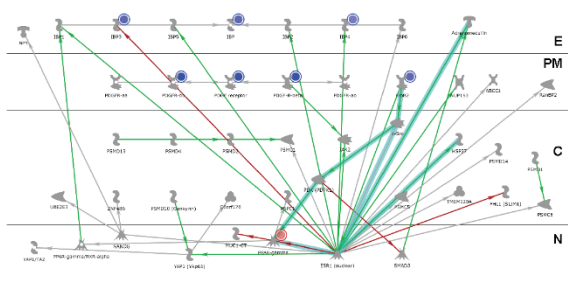

## N\_CD8+ Tc1 cells in allergic contact dermatitis

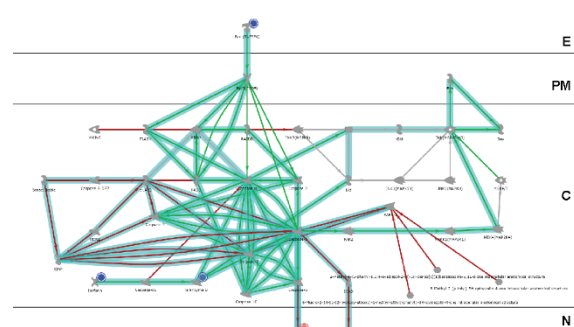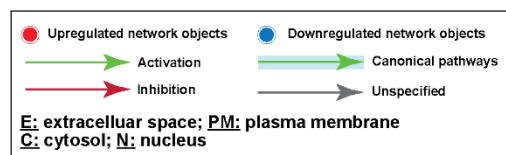

## References

1. Finotello, F., C. Mayer, C. Plattner, G. Laschober, D. Rieder, H. Hackl, A. Krogsdam, Z. Loncova, W. Posch, D. Wilflingseder, S. Sopper, M. Ijsselsteijn, T. P. Brouwer, D. Johnson, Y. Xu, Y. Wang, M. E. Sanders, M. V. Estrada, P. Ericsson-Gonzalez, P. Charoentong, J. Balko, Nfdcc de Miranda, and Z. Trajanoski. "Molecular and Pharmacological Modulators of the Tumor Immune Contexture Revealed by Deconvolution of Rna-Seq Data." *Genome Med* 11, no. 1 (2019): 34.
2. Becht, E., N. A. Giraldo, L. Lacroix, B. Buttard, N. Elarouci, F. Petitprez, J. Selves, P. Laurent-Puig, C. Sautès-Fridman, W. H. Fridman, and A. de Reyniès. "Estimating The population Abundance of Tissue-Infiltrating Immune and Stromal Cell Populations Using Gene Expression." *Genome Biol* 17, no. 1 (2016): 218.
3. Yu, G., L. G. Wang, Y. Han, and Q. Y. He. "Clusterprofiler: An R Package for Comparing Biological Themes among Gene Clusters." *Omics* 16, no. 5 (2012): 284-7.
