# Supplementary material for: Pathway and Network Analyses Identify Growth Factor Signaling and MMP9 as Potential Mediators of Mitochondrial Dysfunction in Severe COVID-19
Source: Int J Mol Sci. 2023 Jan 28;24(3):2524. doi: 10.3390/ijms24032524 (PMC9917147; doi:10.3390/ijms24032524)
Supplement: Supplementary file 1 [file ijms-24-02524-s001.zip]

Archive with 5 entries (5 files):
- Supplement Datasheet S1_List of Unique mitochondrial genes used in this study.xlsx
- Supplement Datasheet S2_List of Gene sets to select mitochondria specific genes.xlsx
- Supplement Datasheet S3_subcellular localization of network objects_050123.xlsx
- Supplement Datasheet S4_SampleInformation.xlsx
- Supplement Figures_kls_100123_1.pdf
