# Supplementary material for: Pathway and Network Analyses Identify Growth Factor Signaling and MMP9 as Potential Mediators of Mitochondrial Dysfunction in Severe COVID-19
Source: Int J Mol Sci. 2023 Jan 28;24(3):2524. doi: 10.3390/ijms24032524 (PMC9917147; doi:10.3390/ijms24032524)
Supplement: Supplementary file 1 [file ijms-24-02524-s001.zip › Supplement Datasheet S1_List of Unique mitochondrial genes used in this study.xlsx]

## Sheet: Supplementary Table S1_mito_gen
gene_symbol "XXXX"
1 "AADAT" "AADAT"
2 "ABCA1" "ABCA1"
3 "ABCA2" "ABCA2"
4 "ABCA3" "ABCA3"
5 "ABCA4" "ABCA4"
6 "ABCA5" "ABCA5"
7 "ABCA6" "ABCA6"
8 "ABCA8" "ABCA8"
9 "ABCA9" "ABCA9"
10 "ABCB6" "ABCB6"
11 "ABCB7" "ABCB7"
12 "ABCC1" "ABCC1"
13 "ABCC2" "ABCC2"
14 "ABCC3" "ABCC3"
15 "ABCC6" "ABCC6"
16 "ABCD1" "ABCD1"
17 "ABCD2" "ABCD2"
18 "ABCD3" "ABCD3"
19 "ABCG4" "ABCG4"
20 "ABCG8" "ABCG8"
21 "ABHD6" "ABHD6"
22 "ABLIM3" "ABLIM3"
23 "ACAA1" "ACAA1"
24 "ACAA2" "ACAA2"
25 "ACAD8" "ACAD8"
26 "ACAD9" "ACAD9"
27 "ACADL" "ACADL"
28 "ACADM" "ACADM"
29 "ACADS" "ACADS"
30 "ACADSB" "ACADSB"
31 "ACADVL" "ACADVL"
32 "ACAT1" "ACAT1"
33 "ACAT2" "ACAT2"
34 "ACE" "ACE"
35 "ACE2" "ACE2"
36 "ACO2" "ACO2"
37 "ACOT2" "ACOT2"
38 "ACOT8" "ACOT8"
39 "ACOX1" "ACOX1"
40 "ACOX2" "ACOX2"
41 "ACOX3" "ACOX3"
42 "ACP1" "ACP1"
43 "ACP2" "ACP2"
44 "ACSL1" "ACSL1"
45 "ACSL4" "ACSL4"
46 "ACSL5" "ACSL5"
47 "ACSM1" "ACSM1"
48 "ACSM3" "ACSM3"
49 "ACSS1" "ACSS1"
50 "ACTN3" "ACTN3"
51 "ACTR10" "ACTR10"
52 "ADCK1" "ADCK1"
53 "ADD1" "ADD1"
54 "ADH1C" "ADH1C"
55 "ADH5" "ADH5"
56 "ADH7" "ADH7"
57 "ADIPOR2" "ADIPOR2"
58 "ADORA2B" "ADORA2B"
59 "ADPGK" "ADPGK"
60 "ADSL" "ADSL"
61 "AFG1L" "AFG1L"
62 "AFG3L2" "AFG3L2"
63 "AGBL4" "AGBL4"
64 "AGK" "AGK"
65 "AGL" "AGL"
66 "AGRN" "AGRN"
67 "AGTPBP1" "AGTPBP1"
68 "AGTR1" "AGTR1"
69 "AGTR2" "AGTR2"
70 "AGXT" "AGXT"
71 "AHCY" "AHCY"
72 "AHCYL1" "AHCYL1"
73 "AIFM1" "AIFM1"
74 "AIFM2" "AIFM2"
75 "AIFM3" "AIFM3"
76 "AIP" "AIP"
77 "AK1" "AK1"
78 "AK2" "AK2"
79 "AK3" "AK3"
80 "AK4" "AK4"
81 "AK5" "AK5"
82 "AK9" "AK9"
83 "AKR1A1" "AKR1A1"
84 "AKR1C2" "AKR1C2"
85 "AKR1C3" "AKR1C3"
86 "AKR1D1" "AKR1D1"
87 "AKT1" "AKT1"
88 "AKT3" "AKT3"
89 "ALAD" "ALAD"
90 "ALAS1" "ALAS1"
91 "ALB" "ALB"
92 "ALDH1A1" "ALDH1A1"
93 "ALDH2" "ALDH2"
94 "ALDH3A1" "ALDH3A1"
95 "ALDH3A2" "ALDH3A2"
96 "ALDH6A1" "ALDH6A1"
97 "ALDH7A1" "ALDH7A1"
98 "ALDH8A1" "ALDH8A1"
99 "ALDH9A1" "ALDH9A1"
100 "ALDOA" "ALDOA"
101 "ALDOB" "ALDOB"
102 "ALDOC" "ALDOC"
103 "ALG1" "ALG1"
104 "ALKBH7" "ALKBH7"
105 "AMACR" "AMACR"
106 "AMBRA1" "AMBRA1"
107 "ANG" "ANG"
108 "ANGPTL3" "ANGPTL3"
109 "ANGPTL4" "ANGPTL4"
110 "ANKH" "ANKH"
111 "ANKZF1" "ANKZF1"
112 "ANTKMT" "ANTKMT"
113 "ANXA1" "ANXA1"
114 "AOC3" "AOC3"
115 "AOX1" "AOX1"
116 "AP3B1" "AP3B1"
117 "AP4B1" "AP4B1"
118 "APEX1" "APEX1"
119 "APOA1" "APOA1"
120 "APOE" "APOE"
121 "APOO" "APOO"
122 "APOOL" "APOOL"
123 "APP" "APP"
124 "AQP7" "AQP7"
125 "AQP9" "AQP9"
126 "AR" "AR"
127 "ARFIP2" "ARFIP2"
128 "ARG1" "ARG1"
129 "ARG2" "ARG2"
130 "ARHGAP11B" "ARHGAP11B"
131 "ARIH2" "ARIH2"
132 "ARL2" "ARL2"
133 "ARMC1" "ARMC1"
134 "ARMCX3" "ARMCX3"
135 "ARNT" "ARNT"
136 "ARPP19" "ARPP19"
137 "ARRB2" "ARRB2"
138 "ARTN" "ARTN"
139 "ASL" "ASL"
140 "ATAD3A" "ATAD3A"
141 "ATAD3B" "ATAD3B"
142 "ATAD3C" "ATAD3C"
143 "ATCAY" "ATCAY"
144 "ATF2" "ATF2"
145 "ATF3" "ATF3"
146 "ATG12" "ATG12"
147 "ATG13" "ATG13"
148 "ATG14" "ATG14"
149 "ATG2A" "ATG2A"
150 "ATG2B" "ATG2B"
151 "ATG3" "ATG3"
152 "ATG4B" "ATG4B"
153 "ATG4D" "ATG4D"
154 "ATG5" "ATG5"
155 "ATG7" "ATG7"
156 "ATG9A" "ATG9A"
157 "ATG9B" "ATG9B"
158 "ATOH8" "ATOH8"
159 "ATOX1" "ATOX1"
160 "ATP13A2" "ATP13A2"
161 "ATP1A2" "ATP1A2"
162 "ATP1B1" "ATP1B1"
163 "ATP23" "ATP23"
164 "ATP2A1" "ATP2A1"
165 "ATP2A2" "ATP2A2"
166 "ATP5F1A" "ATP5F1A"
167 "ATP5F1B" "ATP5F1B"
168 "ATP5F1C" "ATP5F1C"
169 "ATP5F1D" "ATP5F1D"
170 "ATP5F1E" "ATP5F1E"
171 "ATP5F1EP2" "ATP5F1EP2"
172 "ATP5IF1" "ATP5IF1"
173 "ATP5MC1" "ATP5MC1"
174 "ATP5MC2" "ATP5MC2"
175 "ATP5MC3" "ATP5MC3"
176 "ATP5ME" "ATP5ME"
177 "ATP5MF" "ATP5MF"
178 "ATP5MG" "ATP5MG"
179 "ATP5MGL" "ATP5MGL"
180 "ATP5MJ" "ATP5MJ"
181 "ATP5MK" "ATP5MK"
182 "ATP5PB" "ATP5PB"
183 "ATP5PD" "ATP5PD"
184 "ATP5PF" "ATP5PF"
185 "ATP5PO" "ATP5PO"
186 "ATP6AP1" "ATP6AP1"
187 "ATP6V0B" "ATP6V0B"
188 "ATP6V0C" "ATP6V0C"
189 "ATP6V0E1" "ATP6V0E1"
190 "ATP6V1A" "ATP6V1A"
191 "ATP6V1B1" "ATP6V1B1"
192 "ATP6V1B2" "ATP6V1B2"
193 "ATP6V1C1" "ATP6V1C1"
194 "ATP6V1D" "ATP6V1D"
195 "ATP6V1E1" "ATP6V1E1"
196 "ATP6V1F" "ATP6V1F"
197 "ATP6V1G1" "ATP6V1G1"
198 "ATP6V1H" "ATP6V1H"
199 "ATP7A" "ATP7A"
200 "ATPAF1" "ATPAF1"
201 "ATPAF2" "ATPAF2"
202 "ATPSCKMT" "ATPSCKMT"
203 "ATXN1" "ATXN1"
204 "AUH" "AUH"
205 "AURKA" "AURKA"
206 "AVP" "AVP"
207 "AVPR1A" "AVPR1A"
208 "B3GALT6" "B3GALT6"
209 "B3GAT1" "B3GAT1"
210 "B3GAT3" "B3GAT3"
211 "B3GNT3" "B3GNT3"
212 "B4GALT1" "B4GALT1"
213 "B4GALT2" "B4GALT2"
214 "B4GALT4" "B4GALT4"
215 "B4GALT7" "B4GALT7"
216 "BAD" "BAD"
217 "BAG3" "BAG3"
218 "BAG4" "BAG4"
219 "BAK1" "BAK1"
220 "BAP1" "BAP1"
221 "BAX" "BAX"
222 "BBC3" "BBC3"
223 "BBOX1" "BBOX1"
224 "BCAP31" "BCAP31"
225 "BCAR1" "BCAR1"
226 "BCAR3" "BCAR3"
227 "BCAT1" "BCAT1"
228 "BCKDHA" "BCKDHA"
229 "BCKDHB" "BCKDHB"
230 "BCL10" "BCL10"
231 "BCL2" "BCL2"
232 "BCL2L1" "BCL2L1"
233 "BCL2L10" "BCL2L10"
234 "BCL2L11" "BCL2L11"
235 "BCL2L2" "BCL2L2"
236 "BCS1L" "BCS1L"
237 "BDH2" "BDH2"
238 "BECN1" "BECN1"
239 "BEND3" "BEND3"
240 "BGN" "BGN"
241 "BHLHA15" "BHLHA15"
242 "BID" "BID"
243 "BIK" "BIK"
244 "BIRC3" "BIRC3"
245 "BLOC1S2" "BLOC1S2"
246 "BLVRA" "BLVRA"
247 "BLVRB" "BLVRB"
248 "BMF" "BMF"
249 "BMP2" "BMP2"
250 "BMP6" "BMP6"
251 "BMPR1B" "BMPR1B"
252 "BNIP3" "BNIP3"
253 "BNIP3L" "BNIP3L"
254 "BOK" "BOK"
255 "BOLA3" "BOLA3"
256 "BPGM" "BPGM"
257 "BPHL" "BPHL"
258 "BPNT1" "BPNT1"
259 "BRAT1" "BRAT1"
260 "BRCA1" "BRCA1"
261 "BTG2" "BTG2"
262 "BTG3" "BTG3"
263 "C11orf65" "C11orf65"
264 "C12orf73" "C12orf73"
265 "C9orf72" "C9orf72"
266 "CA2" "CA2"
267 "CA4" "CA4"
268 "CA6" "CA6"
269 "CACNA1H" "CACNA1H"
270 "CALM1" "CALM1"
271 "CALM3" "CALM3"
272 "CAMK2A" "CAMK2A"
273 "CAMKK2" "CAMKK2"
274 "CAMKMT" "CAMKMT"
275 "CAPN5" "CAPN5"
276 "CARS2" "CARS2"
277 "CASP1" "CASP1"
278 "CASP2" "CASP2"
279 "CASP3" "CASP3"
280 "CASP4" "CASP4"
281 "CASP6" "CASP6"
282 "CASP7" "CASP7"
283 "CASP8" "CASP8"
284 "CASP9" "CASP9"
285 "CAT" "CAT"
286 "CAV1" "CAV1"
287 "CAV2" "CAV2"
288 "CBFA2T3" "CBFA2T3"
289 "CBR1" "CBR1"
290 "CBR3" "CBR3"
291 "CCAR2" "CCAR2"
292 "CCL25" "CCL25"
293 "CCNA1" "CCNA1"
294 "CCNB1" "CCNB1"
295 "CCND1" "CCND1"
296 "CCND2" "CCND2"
297 "CD14" "CD14"
298 "CD1D" "CD1D"
299 "CD2" "CD2"
300 "CD36" "CD36"
301 "CD38" "CD38"
302 "CD44" "CD44"
303 "CD69" "CD69"
304 "CDA" "CDA"
305 "CDC25B" "CDC25B"
306 "CDC37" "CDC37"
307 "CDK1" "CDK1"
308 "CDK2" "CDK2"
309 "CDK5" "CDK5"
310 "CDKN1A" "CDKN1A"
311 "CDKN1B" "CDKN1B"
312 "CDKN2D" "CDKN2D"
313 "CDO1" "CDO1"
314 "CEBPA" "CEBPA"
315 "CEL" "CEL"
316 "CENPA" "CENPA"
317 "CEP89" "CEP89"
318 "CERS1" "CERS1"
319 "CERT1" "CERT1"
320 "CES1" "CES1"
321 "CFB" "CFB"
322 "CFLAR" "CFLAR"
323 "CGAS" "CGAS"
324 "CH25H" "CH25H"
325 "CHCHD10" "CHCHD10"
326 "CHCHD2" "CHCHD2"
327 "CHCHD3" "CHCHD3"
328 "CHCHD4" "CHCHD4"
329 "CHCHD6" "CHCHD6"
330 "CHCHD7" "CHCHD7"
331 "CHPF" "CHPF"
332 "CHPF2" "CHPF2"
333 "CHST1" "CHST1"
334 "CHST12" "CHST12"
335 "CHST2" "CHST2"
336 "CHST4" "CHST4"
337 "CHST6" "CHST6"
338 "CIBAR1" "CIBAR1"
339 "CIDEA" "CIDEA"
340 "CIDEB" "CIDEB"
341 "CISD2" "CISD2"
342 "CITED2" "CITED2"
343 "CLDN3" "CLDN3"
344 "CLDN9" "CLDN9"
345 "CLN6" "CLN6"
346 "CLN8" "CLN8"
347 "CLPX" "CLPX"
348 "CLU" "CLU"
349 "CLUH" "CLUH"
350 "CNDP2" "CNDP2"
351 "CNP" "CNP"
352 "CNTNAP1" "CNTNAP1"
353 "COA1" "COA1"
354 "COA3" "COA3"
355 "COA4" "COA4"
356 "COA5" "COA5"
357 "COA6" "COA6"
358 "COA8" "COA8"
359 "COG2" "COG2"
360 "COL5A1" "COL5A1"
361 "COL7A1" "COL7A1"
362 "COMT" "COMT"
363 "COPB2" "COPB2"
364 "COQ9" "COQ9"
365 "COX10" "COX10"
366 "COX11" "COX11"
367 "COX14" "COX14"
368 "COX15" "COX15"
369 "COX16" "COX16"
370 "COX17" "COX17"
371 "COX18" "COX18"
372 "COX19" "COX19"
373 "COX20" "COX20"
374 "COX4I1" "COX4I1"
375 "COX4I2" "COX4I2"
376 "COX5A" "COX5A"
377 "COX5B" "COX5B"
378 "COX6A1" "COX6A1"
379 "COX6A2" "COX6A2"
380 "COX6B1" "COX6B1"
381 "COX6C" "COX6C"
382 "COX7A1" "COX7A1"
383 "COX7A2" "COX7A2"
384 "COX7A2L" "COX7A2L"
385 "COX7A2P2" "COX7A2P2"
386 "COX7B" "COX7B"
387 "COX7C" "COX7C"
388 "COX8A" "COX8A"
389 "COX8C" "COX8C"
390 "CPOX" "CPOX"
391 "CPT1A" "CPT1A"
392 "CPT2" "CPT2"
393 "CRAT" "CRAT"
394 "CREBBP" "CREBBP"
395 "CROT" "CROT"
396 "CRP" "CRP"
397 "CRYZ" "CRYZ"
398 "CS" "CS"
399 "CSAD" "CSAD"
400 "CSNK2A2" "CSNK2A2"
401 "CTH" "CTH"
402 "CTNNB1" "CTNNB1"
403 "CTNS" "CTNS"
404 "CTSK" "CTSK"
405 "CTSL" "CTSL"
406 "CTTN" "CTTN"
407 "CXADR" "CXADR"
408 "CXCR4" "CXCR4"
409 "CYB5A" "CYB5A"
410 "CYB5R3" "CYB5R3"
411 "CYBA" "CYBA"
412 "CYBB" "CYBB"
413 "CYC1" "CYC1"
414 "CYCS" "CYCS"
415 "CYFIP2" "CYFIP2"
416 "CYLD" "CYLD"
417 "CYP17A1" "CYP17A1"
418 "CYP1A1" "CYP1A1"
419 "CYP1A2" "CYP1A2"
420 "CYP26A1" "CYP26A1"
421 "CYP27A1" "CYP27A1"
422 "CYP2C18" "CYP2C18"
423 "CYP2E1" "CYP2E1"
424 "CYP2J2" "CYP2J2"
425 "CYP2S1" "CYP2S1"
426 "CYP39A1" "CYP39A1"
427 "CYP46A1" "CYP46A1"
428 "CYP4A11" "CYP4A11"
429 "CYP4A22" "CYP4A22"
430 "CYP4F2" "CYP4F2"
431 "CYP7A1" "CYP7A1"
432 "CYP7B1" "CYP7B1"
433 "CYP8B1" "CYP8B1"
434 "CYRIB" "CYRIB"
435 "D2HGDH" "D2HGDH"
436 "DAP" "DAP"
437 "DAP3" "DAP3"
438 "DCN" "DCN"
439 "DCXR" "DCXR"
440 "DDAH2" "DDAH2"
441 "DDC" "DDC"
442 "DDHD1" "DDHD1"
443 "DDHD2" "DDHD2"
444 "DDIT3" "DDIT3"
445 "DDIT4" "DDIT4"
446 "DDT" "DDT"
447 "DDX58" "DDX58"
448 "DECR1" "DECR1"
449 "DEPDC1" "DEPDC1"
450 "DFFA" "DFFA"
451 "DGUOK" "DGUOK"
452 "DHCR24" "DHCR24"
453 "DHPS" "DHPS"
454 "DHRS1" "DHRS1"
455 "DHRS7" "DHRS7"
456 "DHTKD1" "DHTKD1"
457 "DIABLO" "DIABLO"
458 "DIO1" "DIO1"
459 "DIO2" "DIO2"
460 "DLAT" "DLAT"
461 "DLD" "DLD"
462 "DLST" "DLST"
463 "DMAC1" "DMAC1"
464 "DMAC2" "DMAC2"
465 "DMAC2L" "DMAC2L"
466 "DNA2" "DNA2"
467 "DNAJA1" "DNAJA1"
468 "DNAJA3" "DNAJA3"
469 "DNAJC11" "DNAJC11"
470 "DNAJC15" "DNAJC15"
471 "DNAJC19" "DNAJC19"
472 "DNAJC3" "DNAJC3"
473 "DNAJC30" "DNAJC30"
474 "DNLZ" "DNLZ"
475 "DNM1L" "DNM1L"
476 "DNMT1" "DNMT1"
477 "DPYD" "DPYD"
478 "DPYSL4" "DPYSL4"
479 "DSC2" "DSC2"
480 "EARS2" "EARS2"
481 "EBP" "EBP"
482 "ECD" "ECD"
483 "ECH1" "ECH1"
484 "ECHS1" "ECHS1"
485 "ECI1" "ECI1"
486 "ECI2" "ECI2"
487 "ECSIT" "ECSIT"
488 "EDN1" "EDN1"
489 "EDNRA" "EDNRA"
490 "EFHC1" "EFHC1"
491 "EFNA3" "EFNA3"
492 "EGFR" "EGFR"
493 "EGLN2" "EGLN2"
494 "EGLN3" "EGLN3"
495 "EGR3" "EGR3"
496 "EHHADH" "EHHADH"
497 "EIF6" "EIF6"
498 "ELAC2" "ELAC2"
499 "ELF3" "ELF3"
500 "ELOVL5" "ELOVL5"
501 "EMP1" "EMP1"
502 "ENDOG" "ENDOG"
503 "ENO1" "ENO1"
504 "ENO2" "ENO2"
505 "ENO3" "ENO3"
506 "ENO4" "ENO4"
507 "ENPEP" "ENPEP"
508 "ENPP1" "ENPP1"
509 "ENPP3" "ENPP3"
510 "ENTPD5" "ENTPD5"
511 "EP300" "EP300"
512 "EPAS1" "EPAS1"
513 "EPHA2" "EPHA2"
514 "EPHX1" "EPHX1"
515 "EPHX2" "EPHX2"
516 "ERBB2" "ERBB2"
517 "ERBB3" "ERBB3"
518 "ERBB4" "ERBB4"
519 "ERCC2" "ERCC2"
520 "EREG" "EREG"
521 "ERO1A" "ERO1A"
522 "ERP29" "ERP29"
523 "ESR1" "ESR1"
524 "ETF1" "ETF1"
525 "ETFA" "ETFA"
526 "ETFB" "ETFB"
527 "ETFDH" "ETFDH"
528 "ETS2" "ETS2"
529 "EXT1" "EXT1"
530 "EXT2" "EXT2"
531 "EYA2" "EYA2"
532 "F10" "F10"
533 "F11" "F11"
534 "F2" "F2"
535 "F2R" "F2R"
536 "FABP1" "FABP1"
537 "FABP2" "FABP2"
538 "FADS1" "FADS1"
539 "FADS2" "FADS2"
540 "FAH" "FAH"
541 "FAM162A" "FAM162A"
542 "FANCG" "FANCG"
543 "FAS" "FAS"
544 "FASLG" "FASLG"
545 "FASN" "FASN"
546 "FASTKD3" "FASTKD3"
547 "FBLN1" "FBLN1"
548 "FBP1" "FBP1"
549 "FBP2" "FBP2"
550 "FBXL4" "FBXL4"
551 "FBXO7" "FBXO7"
552 "FBXW7" "FBXW7"
553 "FDX1" "FDX1"
554 "FDXR" "FDXR"
555 "FES" "FES"
556 "FETUB" "FETUB"
557 "FEZ1" "FEZ1"
558 "FH" "FH"
559 "FIGNL1" "FIGNL1"
560 "FIS1" "FIS1"
561 "FKBP4" "FKBP4"
562 "FLCN" "FLCN"
563 "FMC1" "FMC1"
564 "FMO1" "FMO1"
565 "FMO3" "FMO3"
566 "FOXK1" "FOXK1"
567 "FOXK2" "FOXK2"
568 "FOXRED1" "FOXRED1"
569 "FTL" "FTL"
570 "FUNDC1" "FUNDC1"
571 "FUNDC2" "FUNDC2"
572 "FUS" "FUS"
573 "FUT8" "FUT8"
574 "FXN" "FXN"
575 "FZD5" "FZD5"
576 "FZD9" "FZD9"
577 "G0S2" "G0S2"
578 "G6PC1" "G6PC1"
579 "G6PD" "G6PD"
580 "GABARAP" "GABARAP"
581 "GABARAPL1" "GABARAPL1"
582 "GABARAPL2" "GABARAPL2"
583 "GABARAPL3" "GABARAPL3"
584 "GABPB1" "GABPB1"
585 "GAD1" "GAD1"
586 "GAD2" "GAD2"
587 "GADD45A" "GADD45A"
588 "GADD45B" "GADD45B"
589 "GAL3ST1" "GAL3ST1"
590 "GALE" "GALE"
591 "GALK1" "GALK1"
592 "GALK2" "GALK2"
593 "GAPDH" "GAPDH"
594 "GAPDHS" "GAPDHS"
595 "GART" "GART"
596 "GATC" "GATC"
597 "GATM" "GATM"
598 "GBA" "GBA"
599 "GC" "GC"
600 "GCDH" "GCDH"
601 "GCH1" "GCH1"
602 "GCK" "GCK"
603 "GCKR" "GCKR"
604 "GCLC" "GCLC"
605 "GCLM" "GCLM"
606 "GCNT2" "GCNT2"
607 "GDAP1" "GDAP1"
608 "GFER" "GFER"
609 "GFM1" "GFM1"
610 "GFPT1" "GFPT1"
611 "GFUS" "GFUS"
612 "GGCT" "GGCT"
613 "GGNBP1" "GGNBP1"
614 "GGPS1" "GGPS1"
615 "GHITM" "GHITM"
616 "GIT1" "GIT1"
617 "GLCE" "GLCE"
618 "GLRX" "GLRX"
619 "GLRX2" "GLRX2"
620 "GLRX5" "GLRX5"
621 "GLUD1" "GLUD1"
622 "GLUL" "GLUL"
623 "GMPPA" "GMPPA"
624 "GMPPB" "GMPPB"
625 "GNA15" "GNA15"
626 "GNE" "GNE"
627 "GNMT" "GNMT"
628 "GNPAT" "GNPAT"
629 "GNPDA1" "GNPDA1"
630 "GOLPH3" "GOLPH3"
631 "GOT1" "GOT1"
632 "GOT2" "GOT2"
633 "GPC1" "GPC1"
634 "GPC3" "GPC3"
635 "GPC4" "GPC4"
636 "GPD1" "GPD1"
637 "GPD2" "GPD2"
638 "GPER1" "GPER1"
639 "GPI" "GPI"
640 "GPR87" "GPR87"
641 "GPX1" "GPX1"
642 "GPX3" "GPX3"
643 "GPX4" "GPX4"
644 "GRHPR" "GRHPR"
645 "GRPEL1" "GRPEL1"
646 "GRPEL2" "GRPEL2"
647 "GSK3A" "GSK3A"
648 "GSK3B" "GSK3B"
649 "GSN" "GSN"
650 "GSR" "GSR"
651 "GSS" "GSS"
652 "GSTA3" "GSTA3"
653 "GSTK1" "GSTK1"
654 "GSTM1" "GSTM1"
655 "GSTM4" "GSTM4"
656 "GSTO1" "GSTO1"
657 "GSTT2" "GSTT2"
658 "GSTZ1" "GSTZ1"
659 "GTPBP3" "GTPBP3"
660 "GUCY2D" "GUCY2D"
661 "GUSB" "GUSB"
662 "GYG1" "GYG1"
663 "GYS1" "GYS1"
664 "GYS2" "GYS2"
665 "GZMB" "GZMB"
666 "H1-0" "H1-0"
667 "H19" "H19"
668 "H2AZ1" "H2AZ1"
669 "HACL1" "HACL1"
670 "HADH" "HADH"
671 "HADHA" "HADHA"
672 "HADHB" "HADHB"
673 "HAO1" "HAO1"
674 "HAO2" "HAO2"
675 "HAP1" "HAP1"
676 "HAX1" "HAX1"
677 "HCCS" "HCCS"
678 "HDAC4" "HDAC4"
679 "HDAC6" "HDAC6"
680 "HDLBP" "HDLBP"
681 "HEBP2" "HEBP2"
682 "HES6" "HES6"
683 "HGF" "HGF"
684 "HGFAC" "HGFAC"
685 "HHEX" "HHEX"
686 "HIBCH" "HIBCH"
687 "HIF1A" "HIF1A"
688 "HIGD1A" "HIGD1A"
689 "HIGD1B" "HIGD1B"
690 "HIGD1C" "HIGD1C"
691 "HIGD2A" "HIGD2A"
692 "HIGD2B" "HIGD2B"
693 "HIP1R" "HIP1R"
694 "HK1" "HK1"
695 "HK2" "HK2"
696 "HK3" "HK3"
697 "HKDC1" "HKDC1"
698 "HMGB2" "HMGB2"
699 "HMGCL" "HMGCL"
700 "HMGCS1" "HMGCS1"
701 "HMGCS2" "HMGCS2"
702 "HMMR" "HMMR"
703 "HMOX1" "HMOX1"
704 "HMOX2" "HMOX2"
705 "HNF4A" "HNF4A"
706 "HOMER1" "HOMER1"
707 "HPGD" "HPGD"
708 "HPRT1" "HPRT1"
709 "HPS4" "HPS4"
710 "HRG" "HRG"
711 "HRK" "HRK"
712 "HS2ST1" "HS2ST1"
713 "HS6ST2" "HS6ST2"
714 "HSBP1" "HSBP1"
715 "HSD11B1" "HSD11B1"
716 "HSD17B10" "HSD17B10"
717 "HSD17B11" "HSD17B11"
718 "HSD17B2" "HSD17B2"
719 "HSD17B4" "HSD17B4"
720 "HSD17B6" "HSD17B6"
721 "HSD17B7" "HSD17B7"
722 "HSD3B1" "HSD3B1"
723 "HSD3B7" "HSD3B7"
724 "HSDL2" "HSDL2"
725 "HSP90AA1" "HSP90AA1"
726 "HSPA1A" "HSPA1A"
727 "HSPA1B" "HSPA1B"
728 "HSPA1L" "HSPA1L"
729 "HSPA4" "HSPA4"
730 "HSPA5" "HSPA5"
731 "HSPA8" "HSPA8"
732 "HSPA9" "HSPA9"
733 "HSPB1" "HSPB1"
734 "HSPD1" "HSPD1"
735 "HSPH1" "HSPH1"
736 "HTR2A" "HTR2A"
737 "HTRA2" "HTRA2"
738 "HTT" "HTT"
739 "HUWE1" "HUWE1"
740 "IAPP" "IAPP"
741 "IBA57" "IBA57"
742 "ID2" "ID2"
743 "IDH1" "IDH1"
744 "IDH2" "IDH2"
745 "IDH3A" "IDH3A"
746 "IDH3B" "IDH3B"
747 "IDH3G" "IDH3G"
748 "IDI1" "IDI1"
749 "IDUA" "IDUA"
750 "IER3" "IER3"
751 "IFI6" "IFI6"
752 "IFIH1" "IFIH1"
753 "IFIT2" "IFIT2"
754 "IFITM3" "IFITM3"
755 "IFNB1" "IFNB1"
756 "IFNG" "IFNG"
757 "IFNGR1" "IFNGR1"
758 "IGF1" "IGF1"
759 "IGF2R" "IGF2R"
760 "IGFBP1" "IGFBP1"
761 "IGFBP3" "IGFBP3"
762 "IGFBP4" "IGFBP4"
763 "IGFBP6" "IGFBP6"
764 "IKBKE" "IKBKE"
765 "IL13RA1" "IL13RA1"
766 "IL18" "IL18"
767 "IL1A" "IL1A"
768 "IL1B" "IL1B"
769 "IL1R1" "IL1R1"
770 "IL4" "IL4"
771 "IL4I1" "IL4I1"
772 "IL6" "IL6"
773 "IMMP1L" "IMMP1L"
774 "IMMP2L" "IMMP2L"
775 "IMMT" "IMMT"
776 "INF2" "INF2"
777 "INMT" "INMT"
778 "INS" "INS"
779 "INSR" "INSR"
780 "IPCEF1" "IPCEF1"
781 "IRF1" "IRF1"
782 "IRF3" "IRF3"
783 "IRF7" "IRF7"
784 "IRF8" "IRF8"
785 "IRS2" "IRS2"
786 "ISCA1" "ISCA1"
787 "ISCU" "ISCU"
788 "ISG15" "ISG15"
789 "ISG20" "ISG20"
790 "ISOC1" "ISOC1"
791 "ITIH1" "ITIH1"
792 "ITIH4" "ITIH4"
793 "JMJD8" "JMJD8"
794 "JTB" "JTB"
795 "JUN" "JUN"
796 "JUNB" "JUNB"
797 "JUP" "JUP"
798 "KARS1" "KARS1"
799 "KAT2A" "KAT2A"
800 "KDELR3" "KDELR3"
801 "KDR" "KDR"
802 "KIF20A" "KIF20A"
803 "KIF28P" "KIF28P"
804 "KIF2A" "KIF2A"
805 "KLF1" "KLF1"
806 "KMT5A" "KMT5A"
807 "KRT18" "KRT18"
808 "KYNU" "KYNU"
809 "LAMTOR5" "LAMTOR5"
810 "LCAT" "LCAT"
811 "LCK" "LCK"
812 "LCT" "LCT"
813 "LDHA" "LDHA"
814 "LDHB" "LDHB"
815 "LDHC" "LDHC"
816 "LEAP2" "LEAP2"
817 "LEF1" "LEF1"
818 "LEPROT" "LEPROT"
819 "LETM1" "LETM1"
820 "LETMD1" "LETMD1"
821 "LGALS1" "LGALS1"
822 "LGALS3" "LGALS3"
823 "LHPP" "LHPP"
824 "LHX9" "LHX9"
825 "LIG3" "LIG3"
826 "LIPE" "LIPE"
827 "LIPT1" "LIPT1"
828 "LMAN1" "LMAN1"
829 "LMNA" "LMNA"
830 "LONP1" "LONP1"
831 "LONP2" "LONP2"
832 "LPIN2" "LPIN2"
833 "LRBA" "LRBA"
834 "LRPPRC" "LRPPRC"
835 "LRRK2" "LRRK2"
836 "LSP1" "LSP1"
837 "LTC4S" "LTC4S"
838 "LUM" "LUM"
839 "LYRM7" "LYRM7"
840 "MADD" "MADD"
841 "MAIP1" "MAIP1"
842 "MAN1A1" "MAN1A1"
843 "MAN2A1" "MAN2A1"
844 "MAOA" "MAOA"
845 "MAOB" "MAOB"
846 "MAP1B" "MAP1B"
847 "MAP1LC3A" "MAP1LC3A"
848 "MAP1LC3B" "MAP1LC3B"
849 "MAP1LC3B2" "MAP1LC3B2"
850 "MAP1LC3C" "MAP1LC3C"
851 "MAP1S" "MAP1S"
852 "MAPK8" "MAPK8"
853 "MAPT" "MAPT"
854 "MARCHF5" "MARCHF5"
855 "MARCHF6" "MARCHF6"
856 "MARCKS" "MARCKS"
857 "MARK1" "MARK1"
858 "MARK2" "MARK2"
859 "MAVS" "MAVS"
860 "MBL2" "MBL2"
861 "MBP" "MBP"
862 "MCCC2" "MCCC2"
863 "MCEE" "MCEE"
864 "MCL1" "MCL1"
865 "MCU" "MCU"
866 "MCUB" "MCUB"
867 "MCUR1" "MCUR1"
868 "MDH1" "MDH1"
869 "MDH2" "MDH2"
870 "ME1" "ME1"
871 "ME2" "ME2"
872 "MED24" "MED24"
873 "MEF2A" "MEF2A"
874 "MERTK" "MERTK"
875 "MET" "MET"
876 "METAP1" "METAP1"
877 "METTL4" "METTL4"
878 "MFF" "MFF"
879 "MFN1" "MFN1"
880 "MFN2" "MFN2"
881 "MFSD14A" "MFSD14A"
882 "MGARP" "MGARP"
883 "MGLL" "MGLL"
884 "MGME1" "MGME1"
885 "MGMT" "MGMT"
886 "MGST1" "MGST1"
887 "MGST3" "MGST3"
888 "MICALL2" "MICALL2"
889 "MICOS10" "MICOS10"
890 "MICOS13" "MICOS13"
891 "MICU1" "MICU1"
892 "MICU2" "MICU2"
893 "MICU3" "MICU3"
894 "MIEF1" "MIEF1"
895 "MIEF2" "MIEF2"
896 "MIF" "MIF"
897 "MIGA1" "MIGA1"
898 "MIGA2" "MIGA2"
899 "MIOX" "MIOX"
900 "MIPEP" "MIPEP"
901 "MIR144" "MIR144"
902 "MIR17" "MIR17"
903 "MIR210" "MIR210"
904 "MIR29A" "MIR29A"
905 "MIR29B1" "MIR29B1"
906 "MIR29C" "MIR29C"
907 "MIR675" "MIR675"
908 "MIX23" "MIX23"
909 "MLLT11" "MLLT11"
910 "MLST8" "MLST8"
911 "MLXIPL" "MLXIPL"
912 "MLYCD" "MLYCD"
913 "MMP1" "MMP1"
914 "MMP2" "MMP2"
915 "MMP9" "MMP9"
916 "MOAP1" "MOAP1"
917 "MPC1" "MPC1"
918 "MPI" "MPI"
919 "MPO" "MPO"
920 "MPP2" "MPP2"
921 "MPV17" "MPV17"
922 "MPV17L" "MPV17L"
923 "MRM1" "MRM1"
924 "MRM2" "MRM2"
925 "MRM3" "MRM3"
926 "MRPL11" "MRPL11"
927 "MRPL12" "MRPL12"
928 "MRPL15" "MRPL15"
929 "MRPL18" "MRPL18"
930 "MRPL34" "MRPL34"
931 "MRPL35" "MRPL35"
932 "MRPS11" "MRPS11"
933 "MRPS12" "MRPS12"
934 "MRPS14" "MRPS14"
935 "MRPS15" "MRPS15"
936 "MRPS22" "MRPS22"
937 "MRPS23" "MRPS23"
938 "MRPS25" "MRPS25"
939 "MRPS30" "MRPS30"
940 "MSRA" "MSRA"
941 "MSTO1" "MSTO1"
942 "MT-ATP6" "MT-ATP6"
943 "MT-ATP8" "MT-ATP8"
944 "MT-CO1" "MT-CO1"
945 "MT-CO2" "MT-CO2"
946 "MT-CO3" "MT-CO3"
947 "MT-CYB" "MT-CYB"
948 "MT-ND1" "MT-ND1"
949 "MT-ND2" "MT-ND2"
950 "MT-ND3" "MT-ND3"
951 "MT-ND4" "MT-ND4"
952 "MT-ND4L" "MT-ND4L"
953 "MT-ND5" "MT-ND5"
954 "MT-ND6" "MT-ND6"
955 "MT-RNR1" "MT-RNR1"
956 "MT-RNR2" "MT-RNR2"
957 "MT-TE" "MT-TE"
958 "MT-TF" "MT-TF"
959 "MT-TH" "MT-TH"
960 "MT-TL1" "MT-TL1"
961 "MT-TL2" "MT-TL2"
962 "MT-TN" "MT-TN"
963 "MT-TQ" "MT-TQ"
964 "MT-TS2" "MT-TS2"
965 "MT-TW" "MT-TW"
966 "MT2A" "MT2A"
967 "MTCH2" "MTCH2"
968 "MTCO2P12" "MTCO2P12"
969 "MTERF4" "MTERF4"
970 "MTFMT" "MTFMT"
971 "MTFP1" "MTFP1"
972 "MTFR1" "MTFR1"
973 "MTFR1L" "MTFR1L"
974 "MTFR2" "MTFR2"
975 "MTHFD1" "MTHFD1"
976 "MTM1" "MTM1"
977 "MTO1" "MTO1"
978 "MTOR" "MTOR"
979 "MTRF1" "MTRF1"
980 "MTRR" "MTRR"
981 "MTX1" "MTX1"
982 "MTX2" "MTX2"
983 "MTX3" "MTX3"
984 "MUL1" "MUL1"
985 "MXI1" "MXI1"
986 "MYH14" "MYH14"
987 "MYH3" "MYH3"
988 "MYH4" "MYH4"
989 "MYH6" "MYH6"
990 "MYH7" "MYH7"
991 "MYH8" "MYH8"
992 "MYO19" "MYO19"
993 "NADK" "NADK"
994 "NADK2" "NADK2"
995 "NAIF1" "NAIF1"
996 "NANP" "NANP"
997 "NASP" "NASP"
998 "NBN" "NBN"
999 "NCAPH2" "NCAPH2"
1000 "NCOR1" "NCOR1"
1001 "NDRG2" "NDRG2"
1002 "NDST3" "NDST3"
1003 "NDUFA1" "NDUFA1"
1004 "NDUFA10" "NDUFA10"
1005 "NDUFA11" "NDUFA11"
1006 "NDUFA12" "NDUFA12"
1007 "NDUFA13" "NDUFA13"
1008 "NDUFA2" "NDUFA2"
1009 "NDUFA3" "NDUFA3"
1010 "NDUFA4" "NDUFA4"
1011 "NDUFA5" "NDUFA5"
1012 "NDUFA6" "NDUFA6"
1013 "NDUFA7" "NDUFA7"
1014 "NDUFA8" "NDUFA8"
1015 "NDUFA9" "NDUFA9"
1016 "NDUFAB1" "NDUFAB1"
1017 "NDUFAF1" "NDUFAF1"
1018 "NDUFAF2" "NDUFAF2"
1019 "NDUFAF3" "NDUFAF3"
1020 "NDUFAF4" "NDUFAF4"
1021 "NDUFAF5" "NDUFAF5"
1022 "NDUFAF6" "NDUFAF6"
1023 "NDUFAF7" "NDUFAF7"
1024 "NDUFAF8" "NDUFAF8"
1025 "NDUFB1" "NDUFB1"
1026 "NDUFB10" "NDUFB10"
1027 "NDUFB11" "NDUFB11"
1028 "NDUFB2" "NDUFB2"
1029 "NDUFB3" "NDUFB3"
1030 "NDUFB4" "NDUFB4"
1031 "NDUFB5" "NDUFB5"
1032 "NDUFB6" "NDUFB6"
1033 "NDUFB7" "NDUFB7"
1034 "NDUFB8" "NDUFB8"
1035 "NDUFB9" "NDUFB9"
1036 "NDUFC1" "NDUFC1"
1037 "NDUFC2" "NDUFC2"
1038 "NDUFC2-KCTD14" "NDUFC2-KCTD14"
1039 "NDUFS1" "NDUFS1"
1040 "NDUFS2" "NDUFS2"
1041 "NDUFS3" "NDUFS3"
1042 "NDUFS4" "NDUFS4"
1043 "NDUFS5" "NDUFS5"
1044 "NDUFS6" "NDUFS6"
1045 "NDUFS7" "NDUFS7"
1046 "NDUFS8" "NDUFS8"
1047 "NDUFV1" "NDUFV1"
1048 "NDUFV2" "NDUFV2"
1049 "NDUFV3" "NDUFV3"
1050 "NEB" "NEB"
1051 "NECTIN2" "NECTIN2"
1052 "NEDD4" "NEDD4"
1053 "NEDD9" "NEDD9"
1054 "NEFH" "NEFH"
1055 "NEFL" "NEFL"
1056 "NFKB1" "NFKB1"
1057 "NFKB2" "NFKB2"
1058 "NFS1" "NFS1"
1059 "NFU1" "NFU1"
1060 "NINJ1" "NINJ1"
1061 "NIPSNAP2" "NIPSNAP2"
1062 "NLRX1" "NLRX1"
1063 "NMNAT1" "NMNAT1"
1064 "NMT1" "NMT1"
1065 "NNT" "NNT"
1066 "NOL3" "NOL3"
1067 "NOS3" "NOS3"
1068 "NOX1" "NOX1"
1069 "NPC1" "NPC1"
1070 "NPEPPS" "NPEPPS"
1071 "NPTX1" "NPTX1"
1072 "NQO1" "NQO1"
1073 "NQO2" "NQO2"
1074 "NR0B2" "NR0B2"
1075 "NR1H4" "NR1H4"
1076 "NR1I2" "NR1I2"
1077 "NR3C2" "NR3C2"
1078 "NSDHL" "NSDHL"
1079 "NSUN4" "NSUN4"
1080 "NT5E" "NT5E"
1081 "NTHL1" "NTHL1"
1082 "NUBPL" "NUBPL"
1083 "NUDT12" "NUDT12"
1084 "NUDT2" "NUDT2"
1085 "NUDT5" "NUDT5"
1086 "NUPR1" "NUPR1"
1087 "OAT" "OAT"
1088 "ODC1" "ODC1"
1089 "OGDH" "OGDH"
1090 "OGDHL" "OGDHL"
1091 "OGT" "OGT"
1092 "OLA1" "OLA1"
1093 "OMA1" "OMA1"
1094 "OPA1" "OPA1"
1095 "OPTN" "OPTN"
1096 "OSTC" "OSTC"
1097 "OXA1L" "OXA1L"
1098 "OXSR1" "OXSR1"
1099 "P2RX7" "P2RX7"
1100 "P4HA1" "P4HA1"
1101 "P4HA2" "P4HA2"
1102 "PACS2" "PACS2"
1103 "PAK1" "PAK1"
1104 "PAM" "PAM"
1105 "PAM16" "PAM16"
1106 "PANK2" "PANK2"
1107 "PAOX" "PAOX"
1108 "PAPSS2" "PAPSS2"
1109 "PARG" "PARG"
1110 "PARK7" "PARK7"
1111 "PARL" "PARL"
1112 "PARP1" "PARP1"
1113 "PAXIP1" "PAXIP1"
1114 "PC" "PC"
1115 "PCBD1" "PCBD1"
1116 "PDCD4" "PDCD4"
1117 "PDCD5" "PDCD5"
1118 "PDE2A" "PDE2A"
1119 "PDGFRB" "PDGFRB"
1120 "PDHA1" "PDHA1"
1121 "PDHB" "PDHB"
1122 "PDHX" "PDHX"
1123 "PDK3" "PDK3"
1124 "PDK4" "PDK4"
1125 "PDLIM1" "PDLIM1"
1126 "PDLIM5" "PDLIM5"
1127 "PDP1" "PDP1"
1128 "PDZD8" "PDZD8"
1129 "PEA15" "PEA15"
1130 "PECR" "PECR"
1131 "PEMT" "PEMT"
1132 "PET100" "PET100"
1133 "PET117" "PET117"
1134 "PEX1" "PEX1"
1135 "PEX11A" "PEX11A"
1136 "PEX11G" "PEX11G"
1137 "PEX12" "PEX12"
1138 "PEX13" "PEX13"
1139 "PEX16" "PEX16"
1140 "PEX19" "PEX19"
1141 "PEX26" "PEX26"
1142 "PEX5" "PEX5"
1143 "PEX6" "PEX6"
1144 "PEX7" "PEX7"
1145 "PFKFB1" "PFKFB1"
1146 "PFKFB2" "PFKFB2"
1147 "PFKL" "PFKL"
1148 "PFKM" "PFKM"
1149 "PFKP" "PFKP"
1150 "PGAM1" "PGAM1"
1151 "PGAM2" "PGAM2"
1152 "PGAM4" "PGAM4"
1153 "PGAM5" "PGAM5"
1154 "PGD" "PGD"
1155 "PGK1" "PGK1"
1156 "PGK2" "PGK2"
1157 "PGLS" "PGLS"
1158 "PGM1" "PGM1"
1159 "PGM2" "PGM2"
1160 "PGRMC1" "PGRMC1"
1161 "PHB1" "PHB1"
1162 "PHB2" "PHB2"
1163 "PHKA2" "PHKA2"
1164 "PHYH" "PHYH"
1165 "PID1" "PID1"
1166 "PIF1" "PIF1"
1167 "PINK1" "PINK1"
1168 "PIPOX" "PIPOX"
1169 "PISD" "PISD"
1170 "PITRM1" "PITRM1"
1171 "PKLR" "PKLR"
1172 "PKM" "PKM"
1173 "PKP2" "PKP2"
1174 "PLA2G6" "PLA2G6"
1175 "PLAT" "PLAT"
1176 "PLAUR" "PLAUR"
1177 "PLCB2" "PLCB2"
1178 "PLD6" "PLD6"
1179 "PLEC" "PLEC"
1180 "PLG" "PLG"
1181 "PLIN5" "PLIN5"
1182 "PLOD1" "PLOD1"
1183 "PLOD2" "PLOD2"
1184 "PLPPR4" "PLPPR4"
1185 "PLSCR3" "PLSCR3"
1186 "PMAIP1" "PMAIP1"
1187 "PMM1" "PMM1"
1188 "PMM2" "PMM2"
1189 "PMPCA" "PMPCA"
1190 "PMPCB" "PMPCB"
1191 "PNPLA8" "PNPLA8"
1192 "PNPT1" "PNPT1"
1193 "POLDIP2" "POLDIP2"
1194 "POLG" "POLG"
1195 "POLG2" "POLG2"
1196 "POLR2F" "POLR2F"
1197 "POLR3K" "POLR3K"
1198 "POR" "POR"
1199 "PPARA" "PPARA"
1200 "PPARD" "PPARD"
1201 "PPARG" "PPARG"
1202 "PPARGC1A" "PPARGC1A"
1203 "PPFIA4" "PPFIA4"
1204 "PPIA" "PPIA"
1205 "PPIF" "PPIF"
1206 "PPM1B" "PPM1B"
1207 "PPP2CB" "PPP2CB"
1208 "PPP2R5B" "PPP2R5B"
1209 "PPP3R1" "PPP3R1"
1210 "PPT1" "PPT1"
1211 "PRDX1" "PRDX1"
1212 "PRDX2" "PRDX2"
1213 "PRDX3" "PRDX3"
1214 "PRDX4" "PRDX4"
1215 "PRDX5" "PRDX5"
1216 "PRDX6" "PRDX6"
1217 "PRELID1" "PRELID1"
1218 "PREPL" "PREPL"
1219 "PRF1" "PRF1"
1220 "PRIMPOL" "PRIMPOL"
1221 "PRKAA1" "PRKAA1"
1222 "PRKAA2" "PRKAA2"
1223 "PRKAG1" "PRKAG1"
1224 "PRKAG2" "PRKAG2"
1225 "PRKAG3" "PRKAG3"
1226 "PRKN" "PRKN"
1227 "PRMT6" "PRMT6"
1228 "PRNP" "PRNP"
1229 "PRORP" "PRORP"
1230 "PROS1" "PROS1"
1231 "PRPS1" "PRPS1"
1232 "PRXL2C" "PRXL2C"
1233 "PSEN1" "PSEN1"
1234 "PSEN2" "PSEN2"
1235 "PSMB10" "PSMB10"
1236 "PSMC4" "PSMC4"
1237 "PSMD10" "PSMD10"
1238 "PSME1" "PSME1"
1239 "PTCD2" "PTCD2"
1240 "PTCD3" "PTCD3"
1241 "PTGDS" "PTGDS"
1242 "PTGES" "PTGES"
1243 "PTGES3" "PTGES3"
1244 "PTGR1" "PTGR1"
1245 "PTK2" "PTK2"
1246 "PTPA" "PTPA"
1247 "PTPRG" "PTPRG"
1248 "PTS" "PTS"
1249 "PUM2" "PUM2"
1250 "PUS1" "PUS1"
1251 "PXMP2" "PXMP2"
1252 "PYCARD" "PYCARD"
1253 "PYCR1" "PYCR1"
1254 "PYGB" "PYGB"
1255 "PYGL" "PYGL"
1256 "PYROXD2" "PYROXD2"
1257 "QRSL1" "QRSL1"
1258 "QSOX1" "QSOX1"
1259 "RAB29" "RAB29"
1260 "RAB32" "RAB32"
1261 "RAB38" "RAB38"
1262 "RAB3A" "RAB3A"
1263 "RAB5IF" "RAB5IF"
1264 "RAC2" "RAC2"
1265 "RALA" "RALA"
1266 "RALBP1" "RALBP1"
1267 "RAP1GAP" "RAP1GAP"
1268 "RAP1GDS1" "RAP1GDS1"
1269 "RARA" "RARA"
1270 "RARS1" "RARS1"
1271 "RB1CC1" "RB1CC1"
1272 "RBCK1" "RBCK1"
1273 "RBP1" "RBP1"
1274 "RBP4" "RBP4"
1275 "RCC1L" "RCC1L"
1276 "RDH11" "RDH11"
1277 "RDH16" "RDH16"
1278 "REEP6" "REEP6"
1279 "REG1A" "REG1A"
1280 "RELA" "RELA"
1281 "REN" "REN"
1282 "RETREG1" "RETREG1"
1283 "RETSAT" "RETSAT"
1284 "RHOB" "RHOB"
1285 "RHOT1" "RHOT1"
1286 "RHOT2" "RHOT2"
1287 "RHOU" "RHOU"
1288 "RIMOC1" "RIMOC1"
1289 "RNASEL" "RNASEL"
1290 "RNF186" "RNF186"
1291 "RNF31" "RNF31"
1292 "RNF41" "RNF41"
1293 "ROCK1" "ROCK1"
1294 "ROMO1" "ROMO1"
1295 "RPE" "RPE"
1296 "RPTOR" "RPTOR"
1297 "RRAGD" "RRAGD"
1298 "RRM1" "RRM1"
1299 "RRM2B" "RRM2B"
1300 "RTL10" "RTL10"
1301 "RXRA" "RXRA"
1302 "RXRG" "RXRG"
1303 "S100A10" "S100A10"
1304 "SAE1" "SAE1"
1305 "SAMM50" "SAMM50"
1306 "SAP30" "SAP30"
1307 "SAR1B" "SAR1B"
1308 "SAT1" "SAT1"
1309 "SATB1" "SATB1"
1310 "SBNO2" "SBNO2"
1311 "SC5D" "SC5D"
1312 "SCAF4" "SCAF4"
1313 "SCO1" "SCO1"
1314 "SCO2" "SCO2"
1315 "SCP2" "SCP2"
1316 "SDC1" "SDC1"
1317 "SDC2" "SDC2"
1318 "SDC3" "SDC3"
1319 "SDHA" "SDHA"
1320 "SDHAF1" "SDHAF1"
1321 "SDHAF2" "SDHAF2"
1322 "SDHAF3" "SDHAF3"
1323 "SDHAF4" "SDHAF4"
1324 "SDHB" "SDHB"
1325 "SDHC" "SDHC"
1326 "SDHD" "SDHD"
1327 "SELENON" "SELENON"
1328 "SELENOS" "SELENOS"
1329 "SERINC1" "SERINC1"
1330 "SERPINA6" "SERPINA6"
1331 "SERPINE1" "SERPINE1"
1332 "SERTAD1" "SERTAD1"
1333 "SESN2" "SESN2"
1334 "SFN" "SFN"
1335 "SH3GLB1" "SH3GLB1"
1336 "SHARPIN" "SHARPIN"
1337 "SHMT2" "SHMT2"
1338 "SIAH3" "SIAH3"
1339 "SIRT4" "SIRT4"
1340 "SIRT5" "SIRT5"
1341 "SIRT6" "SIRT6"
1342 "SIRT7" "SIRT7"
1343 "SLC12A4" "SLC12A4"
1344 "SLC16A3" "SLC16A3"
1345 "SLC19A3" "SLC19A3"
1346 "SLC1A5" "SLC1A5"
1347 "SLC20A1" "SLC20A1"
1348 "SLC22A1" "SLC22A1"
1349 "SLC22A18" "SLC22A18"
1350 "SLC22A5" "SLC22A5"
1351 "SLC23A1" "SLC23A1"
1352 "SLC23A2" "SLC23A2"
1353 "SLC25A10" "SLC25A10"
1354 "SLC25A11" "SLC25A11"
1355 "SLC25A12" "SLC25A12"
1356 "SLC25A13" "SLC25A13"
1357 "SLC25A20" "SLC25A20"
1358 "SLC25A23" "SLC25A23"
1359 "SLC25A25" "SLC25A25"
1360 "SLC25A26" "SLC25A26"
1361 "SLC25A3" "SLC25A3"
1362 "SLC25A31" "SLC25A31"
1363 "SLC25A33" "SLC25A33"
1364 "SLC25A36" "SLC25A36"
1365 "SLC25A4" "SLC25A4"
1366 "SLC25A46" "SLC25A46"
1367 "SLC25A5" "SLC25A5"
1368 "SLC25A6" "SLC25A6"
1369 "SLC27A2" "SLC27A2"
1370 "SLC27A5" "SLC27A5"
1371 "SLC29A1" "SLC29A1"
1372 "SLC2A6" "SLC2A6"
1373 "SLC34A1" "SLC34A1"
1374 "SLC35A3" "SLC35A3"
1375 "SLC35B1" "SLC35B1"
1376 "SLC35B2" "SLC35B2"
1377 "SLC35D1" "SLC35D1"
1378 "SLC35F6" "SLC35F6"
1379 "SLC37A4" "SLC37A4"
1380 "SLC39A8" "SLC39A8"
1381 "SLC3A1" "SLC3A1"
1382 "SLC46A3" "SLC46A3"
1383 "SLC4A1" "SLC4A1"
1384 "SLC4A4" "SLC4A4"
1385 "SLC4A5" "SLC4A5"
1386 "SLC6A12" "SLC6A12"
1387 "SLC6A6" "SLC6A6"
1388 "SLC9A1" "SLC9A1"
1389 "SLCO1A2" "SLCO1A2"
1390 "SLIRP" "SLIRP"
1391 "SMAD7" "SMAD7"
1392 "SMDT1" "SMDT1"
1393 "SMIM20" "SMIM20"
1394 "SMIM4" "SMIM4"
1395 "SMOX" "SMOX"
1396 "SMS" "SMS"
1397 "SNCA" "SNCA"
1398 "SNX30" "SNX30"
1399 "SNX7" "SNX7"
1400 "SOAT2" "SOAT2"
1401 "SOD1" "SOD1"
1402 "SOD2" "SOD2"
1403 "SOX9" "SOX9"
1404 "SPAG4" "SPAG4"
1405 "SPAST" "SPAST"
1406 "SPATA18" "SPATA18"
1407 "SPATA19" "SPATA19"
1408 "SPATA33" "SPATA33"
1409 "SPG7" "SPG7"
1410 "SPHK2" "SPHK2"
1411 "SPINT2" "SPINT2"
1412 "SPIRE1" "SPIRE1"
1413 "SPTAN1" "SPTAN1"
1414 "SQSTM1" "SQSTM1"
1415 "SRD5A3" "SRD5A3"
1416 "SREBF1" "SREBF1"
1417 "SREBF2" "SREBF2"
1418 "SRXN1" "SRXN1"
1419 "SSBP1" "SSBP1"
1420 "SSR3" "SSR3"
1421 "STAT2" "STAT2"
1422 "STAT3" "STAT3"
1423 "STC1" "STC1"
1424 "STC2" "STC2"
1425 "STING1" "STING1"
1426 "STK25" "STK25"
1427 "STMN1" "STMN1"
1428 "STMP1" "STMP1"
1429 "STOML2" "STOML2"
1430 "STOX1" "STOX1"
1431 "STPG1" "STPG1"
1432 "SUCLA2" "SUCLA2"
1433 "SUCLG1" "SUCLG1"
1434 "SUCLG2" "SUCLG2"
1435 "SULT1B1" "SULT1B1"
1436 "SULT2B1" "SULT2B1"
1437 "SUPV3L1" "SUPV3L1"
1438 "SURF1" "SURF1"
1439 "SYBU" "SYBU"
1440 "TACO1" "TACO1"
1441 "TAFAZZIN" "TAFAZZIN"
1442 "TALDO1" "TALDO1"
1443 "TAP1" "TAP1"
1444 "TARDBP" "TARDBP"
1445 "TAT" "TAT"
1446 "TBK1" "TBK1"
1447 "TCIRG1" "TCIRG1"
1448 "TDO2" "TDO2"
1449 "TEFM" "TEFM"
1450 "TERT" "TERT"
1451 "TFAM" "TFAM"
1452 "TFB1M" "TFB1M"
1453 "TFCP2L1" "TFCP2L1"
1454 "TFF3" "TFF3"
1455 "TFRC" "TFRC"
1456 "TGFA" "TGFA"
1457 "TGFB1" "TGFB1"
1458 "TGFB2" "TGFB2"
1459 "TGFBI" "TGFBI"
1460 "TGFBR3" "TGFBR3"
1461 "THEM4" "THEM4"
1462 "THG1L" "THG1L"
1463 "TICAM1" "TICAM1"
1464 "TIGAR" "TIGAR"
1465 "TIMM10" "TIMM10"
1466 "TIMM10B" "TIMM10B"
1467 "TIMM13" "TIMM13"
1468 "TIMM17A" "TIMM17A"
1469 "TIMM17B" "TIMM17B"
1470 "TIMM21" "TIMM21"
1471 "TIMM22" "TIMM22"
1472 "TIMM23" "TIMM23"
1473 "TIMM23B" "TIMM23B"
1474 "TIMM29" "TIMM29"
1475 "TIMM44" "TIMM44"
1476 "TIMM50" "TIMM50"
1477 "TIMM8A" "TIMM8A"
1478 "TIMM8B" "TIMM8B"
1479 "TIMM9" "TIMM9"
1480 "TIMMDC1" "TIMMDC1"
1481 "TIMP1" "TIMP1"
1482 "TIMP2" "TIMP2"
1483 "TIMP3" "TIMP3"
1484 "TK2" "TK2"
1485 "TKFC" "TKFC"
1486 "TKTL1" "TKTL1"
1487 "TLE6" "TLE6"
1488 "TLR3" "TLR3"
1489 "TLR7" "TLR7"
1490 "TMBIM6" "TMBIM6"
1491 "TMEM102" "TMEM102"
1492 "TMEM11" "TMEM11"
1493 "TMEM126A" "TMEM126A"
1494 "TMEM126B" "TMEM126B"
1495 "TMEM135" "TMEM135"
1496 "TMEM14A" "TMEM14A"
1497 "TMEM176B" "TMEM176B"
1498 "TMEM186" "TMEM186"
1499 "TMEM223" "TMEM223"
1500 "TMEM242" "TMEM242"
1501 "TMEM70" "TMEM70"
1502 "TMEM97" "TMEM97"
1503 "TMPRSS2" "TMPRSS2"
1504 "TMSB4X" "TMSB4X"
1505 "TNF" "TNF"
1506 "TNFRSF12A" "TNFRSF12A"
1507 "TNFRSF1A" "TNFRSF1A"
1508 "TNFSF10" "TNFSF10"
1509 "TOMM20" "TOMM20"
1510 "TOMM20L" "TOMM20L"
1511 "TOMM22" "TOMM22"
1512 "TOMM34" "TOMM34"
1513 "TOMM40" "TOMM40"
1514 "TOMM40L" "TOMM40L"
1515 "TOMM5" "TOMM5"
1516 "TOMM6" "TOMM6"
1517 "TOMM7" "TOMM7"
1518 "TOMM70" "TOMM70"
1519 "TOP2A" "TOP2A"
1520 "TOP3A" "TOP3A"
1521 "TP53" "TP53"
1522 "TP53INP2" "TP53INP2"
1523 "TPBG" "TPBG"
1524 "TPI1" "TPI1"
1525 "TPST1" "TPST1"
1526 "TRAF3" "TRAF3"
1527 "TRAF6" "TRAF6"
1528 "TRAK1" "TRAK1"
1529 "TRAK2" "TRAK2"
1530 "TREM2" "TREM2"
1531 "TREX1" "TREX1"
1532 "TRIAP1" "TRIAP1"
1533 "TRIT1" "TRIT1"
1534 "TRMT10B" "TRMT10B"
1535 "TRMT10C" "TRMT10C"
1536 "TRMT5" "TRMT5"
1537 "TRMT61B" "TRMT61B"
1538 "TRMU" "TRMU"
1539 "TRNT1" "TRNT1"
1540 "TSC2" "TSC2"
1541 "TSFM" "TSFM"
1542 "TSPO" "TSPO"
1543 "TST" "TST"
1544 "TTC19" "TTC19"
1545 "TTN" "TTN"
1546 "TTPA" "TTPA"
1547 "TTR" "TTR"
1548 "TWNK" "TWNK"
1549 "TXN" "TXN"
1550 "TXN2" "TXN2"
1551 "TXNIP" "TXNIP"
1552 "TXNRD1" "TXNRD1"
1553 "TXNRD2" "TXNRD2"
1554 "TYMP" "TYMP"
1555 "TYR" "TYR"
1556 "UBB" "UBB"
1557 "UBE2D3" "UBE2D3"
1558 "UBE2J2" "UBE2J2"
1559 "UBE2L3" "UBE2L3"
1560 "UBE2L6" "UBE2L6"
1561 "UBL4B" "UBL4B"
1562 "UBL5" "UBL5"
1563 "UCHL1" "UCHL1"
1564 "UGDH" "UGDH"
1565 "UGP2" "UGP2"
1566 "ULK1" "ULK1"
1567 "ULK2" "ULK2"
1568 "UPB1" "UPB1"
1569 "UPP1" "UPP1"
1570 "UQCC1" "UQCC1"
1571 "UQCC2" "UQCC2"
1572 "UQCC3" "UQCC3"
1573 "UQCR10" "UQCR10"
1574 "UQCR11" "UQCR11"
1575 "UQCRB" "UQCRB"
1576 "UQCRC1" "UQCRC1"
1577 "UQCRC2" "UQCRC2"
1578 "UQCRFS1" "UQCRFS1"
1579 "UQCRFS1P1" "UQCRFS1P1"
1580 "UQCRH" "UQCRH"
1581 "UQCRHL" "UQCRHL"
1582 "UQCRQ" "UQCRQ"
1583 "UROD" "UROD"
1584 "UROS" "UROS"
1585 "USP30" "USP30"
1586 "USP36" "USP36"
1587 "UXT" "UXT"
1588 "VAT1" "VAT1"
1589 "VCAN" "VCAN"
1590 "VCP" "VCP"
1591 "VDAC1" "VDAC1"
1592 "VDAC2" "VDAC2"
1593 "VDAC3" "VDAC3"
1594 "VEGFA" "VEGFA"
1595 "VLDLR" "VLDLR"
1596 "VMP1" "VMP1"
1597 "VNN1" "VNN1"
1598 "VPS11" "VPS11"
1599 "VPS13A" "VPS13A"
1600 "VPS13C" "VPS13C"
1601 "VPS13D" "VPS13D"
1602 "VPS35" "VPS35"
1603 "VPS9D1" "VPS9D1"
1604 "VTN" "VTN"
1605 "WASF1" "WASF1"
1606 "WDR45" "WDR45"
1607 "WDR45B" "WDR45B"
1608 "WDR81" "WDR81"
1609 "WEE1" "WEE1"
1610 "WIPI1" "WIPI1"
1611 "WIPI2" "WIPI2"
1612 "XDH" "XDH"
1613 "XIAP" "XIAP"
1614 "XIST" "XIST"
1615 "XYLT2" "XYLT2"
1616 "YME1L1" "YME1L1"
1617 "YWHAH" "YWHAH"
1618 "ZBED3" "ZBED3"
1619 "ZBTB20" "ZBTB20"
1620 "ZBTB7A" "ZBTB7A"
1621 "ZDHHC6" "ZDHHC6"
1622 "ZNF205" "ZNF205"
1623 "ZNF292" "ZNF292"
