# Supplementary material for: Pathway and Network Analyses Identify Growth Factor Signaling and MMP9 as Potential Mediators of Mitochondrial Dysfunction in Severe COVID-19
Source: Int J Mol Sci. 2023 Jan 28;24(3):2524. doi: 10.3390/ijms24032524 (PMC9917147; doi:10.3390/ijms24032524)
Supplement: Supplementary file 1 [file ijms-24-02524-s001.zip › Supplement Datasheet S2_List of Gene sets to select mitochondria specific genes.xlsx]

## Sheet: Sheet1
Number of Gene Sets	Name of Gene Sets
1	HALLMARK_OXIDATIVE_PHOSPHORYLATION
2	HALLMARK_GLYCOLYSIS
3	HALLMARK_FATTY_ACID_METABOLISM
4	HALLMARK_XENOBIOTIC_METABOLISM
5	HALLMARK_REACTIVE_OXYGEN_SPECIES_PATHWAY
6	HALLMARK_APOPTOSIS
7	HALLMARK_BILE_ACID_METABOLISM
8	GOBP_ANTEROGRADE_AXONAL_TRANSPORT_OF_MITOCHONDRION
9	GOBP_ATP_METABOLIC_PROCESS
10	GOBP_ATP_SYNTHESIS_COUPLED_ELECTRON_TRANSPORT
11	GOBP_AUTOPHAGY_OF_MITOCHONDRION
12	GOBP_AXONAL_TRANSPORT_OF_MITOCHONDRION
13	GOBP_CALCIUM_IMPORT_INTO_THE_MITOCHONDRION
14	GOBP_ESTABLISHMENT_OF_MITOCHONDRION_LOCALIZATION
15	GOBP_MAINTENANCE_OF_PROTEIN_LOCATION_IN_MITOCHONDRION
16	GOBP_MITOCHONDRIAL_PROTON_TRANSPORTING_ATP_SYNTHASE_COMPLEX_ASSEMBLY
17	GOBP_MITOCHONDRION_DISTRIBUTION
18	GOBP_MITOCHONDRION_ENDOPLASMIC_RETICULUM_MEMBRANE_TETHERING
19	GOBP_MITOCHONDRION_LOCALIZATION
20	GOBP_MITOCHONDRION_MORPHOGENESIS
21	GOBP_MITOCHONDRION_ORGANIZATION
22	GOBP_NEGATIVE_REGULATION_OF_ATP_METABOLIC_PROCESS
23	GOBP_NEGATIVE_REGULATION_OF_AUTOPHAGY_OF_MITOCHONDRION
24	GOBP_NEGATIVE_REGULATION_OF_ESTABLISHMENT_OF_PROTEIN_LOCALIZATION_TO_MITOCHONDRION
25	GOBP_NEGATIVE_REGULATION_OF_MITOCHONDRION_ORGANIZATION
26	GOBP_NEGATIVE_REGULATION_OF_PROTEIN_TARGETING_TO_MITOCHONDRION
27	GOBP_POSITIVE_REGULATION_OF_ATP_METABOLIC_PROCESS
28	GOBP_POSITIVE_REGULATION_OF_AUTOPHAGY_OF_MITOCHONDRION
29	GOBP_POSITIVE_REGULATION_OF_ESTABLISHMENT_OF_PROTEIN_LOCALIZATION_TO_MITOCHONDRION
30	GOBP_POSITIVE_REGULATION_OF_MITOCHONDRION_ORGANIZATION
31	GOBP_PROTEIN_LOCALIZATION_TO_MITOCHONDRION
32	GOBP_PROTEIN_PROCESSING_INVOLVED_IN_PROTEIN_TARGETING_TO_MITOCHONDRION
33	GOBP_PROTEIN_TARGETING_TO_MITOCHONDRION
34	GOBP_REGULATION_OF_ATP_METABOLIC_PROCESS
35	GOBP_REGULATION_OF_AUTOPHAGY_OF_MITOCHONDRION
36	GOBP_REGULATION_OF_AUTOPHAGY_OF_MITOCHONDRION_IN_RESPONSE_TO_MITOCHONDRIAL_DEPOLARIZATION
37	GOBP_REGULATION_OF_ESTABLISHMENT_OF_PROTEIN_LOCALIZATION_TO_MITOCHONDRION
38	GOBP_REGULATION_OF_MITOCHONDRIAL_ATP_SYNTHESIS_COUPLED_ELECTRON_TRANSPORT
39	GOBP_REGULATION_OF_MITOCHONDRION_ORGANIZATION
40	GOBP_RNA_IMPORT_INTO_MITOCHONDRION
41	GOMF_MITOCHONDRION_TARGETING_SEQUENCE_BINDING
42	WP_MITOCHONDRIAL_IMMUNE_RESPONSE_TO_SARSCOV2
43	HP_ABNORMALITY_OF_THE_MITOCHONDRION
44	REACTOME_RRNA_MODIFICATION_IN_THE_MITOCHONDRION
45	REACTOME_RRNA_PROCESSING_IN_THE_MITOCHONDRION
46	REACTOME_TRNA_MODIFICATION_IN_THE_MITOCHONDRION
47	REACTOME_TRNA_PROCESSING_IN_THE_MITOCHONDRION
