# Supplementary material for: Pathway and Network Analyses Identify Growth Factor Signaling and MMP9 as Potential Mediators of Mitochondrial Dysfunction in Severe COVID-19
Source: Int J Mol Sci. 2023 Jan 28;24(3):2524. doi: 10.3390/ijms24032524 (PMC9917147; doi:10.3390/ijms24032524)
Supplement: Supplementary file 1 [file ijms-24-02524-s001.zip › Supplement Datasheet S3_subcellular localization of network objects_050123.xlsx]

## Sheet: Fig4A
Number	Gene symbol	Protein encoded by the network objects	Subcellular localization
1	MMP9	MMP9_HUMAN	collagen-containing extracellular matrix, extracellular exosome, extracellular region, extracellular space, ficolin-1-rich granule lumen, tertiary granule lumen
2	MET	HGF receptor (MET)_HUMAN	basal plasma membrane, cell surface, extracellular region, integral component of membrane, integral component of plasma membrane, plasma membrane, receptor complex
3	SERPINE1	PAI1_HUMAN	collagen-containing extracellular matrix, extracellular exosome, extracellular region, extracellular space, peptidase inhibitor complex, plasma membrane, platelet alpha granule lumen, serine protease inhibitor complex
4	TIMP1	TIMP1_HUMAN	basement membrane, endoplasmic reticulum lumen, extracellular exosome, extracellular matrix, extracellular region, extracellular space, platelet alpha granule lumen
5	HGF	HGF_HUMAN	extracellular region, extracellular space, membrane, platelet alpha granule lumen
6	CDK1	CDK1 (p34)_HUMAN	centrosome,chromosome, telomeric region,cyclin B1-CDK1 complex,cyclin-dependent protein kinase holoenzyme complex,cytosol,endoplasmic reticulum membrane,extracellular exosome,membrane,midbody,mitochondrial matrix,mitochondrion,mitotic spindle,nucleoplasm,nucleus,spindle microtubule
7	IGF1	IGF1_HUMAN	alphav-beta3 integrin-IGF-1-IGF1R complex, exocytic vesicle, extracellular region, extracellular space, insulin-like growth factor binding protein complex, insulin-like growth factor ternary complex, platelet alpha granule lumen
8	IL1R1	IL1R1_HUMAN	external side of plasma membrane, extracellular region, integral component of plasma membrane, membrane, plasma membrane
9	TERT	TERT_HUMAN	chromosome, telomeric region,cytosol,mitochondrial nucleoid,nuclear speck,nuclear telomere cap complex,nucleolus,nucleoplasm,nucleus,plasma membrane,PML body,ribonucleoprotein complex,RNA-directed RNA polymerase complex,telomerase catalytic core complex,telomerase holoenzyme complex,TERT-RMRP complex
10	CCNA1-2	Cyclin A_HUMAN	N/A
11	CCNB1	Cyclin B1_HUMAN	centrosome,cyclin B1-CDK1 complex,cyclin-dependent protein kinase holoenzyme complex,cytoplasm,cytosol,membrane,mitochondrial matrix,nucleoplasm,nucleus,outer kinetochore,spindle pole
12	TIMP3	TIMP3_HUMAN	basement membrane, collagen-containing extracellular matrix, extracellular matrix, extracellular region, extracellular space, nucleus, platelet dense granule lumen
13	GADD45A	GA45A_HUMAN	cytoplasm,nuclear speck,nucleoplasm,nucleus
14	MMP1	MMP1_HUMAN	extracellular matrix, extracellular region
15	IRS2	IRS2_HUMAN	cytosol, plasma membrane, protein-containing complex
16	CLU	CLUS (Clusterin)_HUMAN	apical dendrite,blood microparticle,cell periphery,cell surface,chromaffin granule,collagen-containing extracellular matrix,cytoplasm,cytoskeleton,cytosol,extracellular exosome,extracellular region,extracellular space,Golgi apparatus,intracellular membrane-bounded organelle,membrane,mitochondrial inner membrane,mitochondrion,neurofibrillary tangle,nucleus,perinuclear endoplasmic reticulum lumen,p…
17	CAV2	CAV2 (Caveolin-2)_HUMAN	acrosomal membrane,caveola,caveolar macromolecular signaling complex,cytoplasmic vesicle,extrinsic component of cytoplasmic side of plasma membrane,focal adhesion,Golgi apparatus,Golgi membrane,integral component of plasma membrane,membrane raft,nucleus,perinuclear region of cytoplasm,plasma membrane,protein-containing complex,sarcolemma,transport vesicle
18	TGFA	TGFA_HUMAN	basolateral plasma membrane, cell surface, clathrin-coated endocytic vesicle membrane, cytoplasmic vesicle, endoplasmic reticulum membrane, endoplasmic reticulum-Golgi intermediate compartment membrane, ER to Golgi transport vesicle membrane, extracellular region, extracellular space, integral component of membrane, nucleus, perinuclear region of cytoplasm, plasma membrane
19	TOP2A/B	TOP2_HUMAN	cytoplasm
20	MXI1	MXI1_HUMAN	chromatin,cytosol,nucleolus,nucleoplasm,nucleus,RNA polymerase II transcription regulator complex
21	P4HA2	P4HA2_HUMAN	cytosol,endoplasmic reticulum,endoplasmic reticulum lumen,intracellular membrane-bounded organelle,nucleoplasm
22	TFF3	TFF3_HUMAN	extracellular matrix,extracellular region,extracellular space,secretory granule
23	PPARG	PPARG_HUMAN	chromatin,cytosol,intracellular membrane-bounded organelle,nucleoplasm,nucleus,receptor complex,RNA polymerase II transcription regulator complex
24	LDHA	LDHA_HUMAN	cytosol, extracellular exosome, membrane, nucleus, oxidoreductase complex

## Sheet: Fig4F
Number	Gene symbol	Protein encoded by the network objects	Subcellular localization
1	IRF7	IRF7_HUMAN	chromatin,cytoplasm,cytosol,endosome membrane,nucleoplasm,nucleus
2	ISG15	ISG15_HUMAN	cytoplasm,cytosol,cytosolic small ribosomal subunit,nucleoplasm,nucleus
3	IFIH1	IFIH1_HUMAN	cytoplasm,cytosol,mitochondrion,nucleus
4	TLR3	TLR3_HUMAN	cell surface,cytoplasm,early endosome,endolysosome membrane,endoplasmic reticulum membrane,endosome membrane,extracellular matrix,extracellular space,Golgi membrane,integral component of plasma membrane,lysosomal membrane,membrane
5	FASLG	TNFL6_HUMAN	caveola,cytoplasmic vesicle lumen,external side of plasma membrane,extracellular exosome,extracellular region,extracellular space,integral component of plasma membrane,lysosomal lumen,nucleus,perinuclear region of cytoplasm,plasma membrane
6	TLR7	TLR7_HUMAN	cytoplasm,early phagosome,endolysosome membrane,endoplasmic reticulum,endoplasmic reticulum membrane,endosome,endosome membrane,Golgi membrane,integral component of membrane,lysosome,plasma membrane,receptor complex
7	PRF1	PERF (Perforin-1)_HUMAN	cytolytic granule,cytosol,endosome lumen,extracellular region,integral component of membrane,membrane,plasma membrane
8	STAT2	STAT2_HUMAN	chromatin,cytosol,ISGF3 complex,nucleoplasm,plasma membrane
9	GZMB	GRAB (Granzyme B)_HUMAN	cytolytic granule,cytoplasm,cytosol,extracellular region,immunological synapse,intracellular membrane-bounded organelle,membrane,mitochondrion,nucleus
10	PDGFRB	PGFRB_HUMAN	apical plasma membrane,cell surface,cytoplasm,cytoplasmic vesicle,focal adhesion,Golgi apparatus,integral component of plasma membrane,intracellular membrane-bounded organelle,intrinsic component of plasma membrane,lysosomal lumen,membrane,nucleus,plasma membrane,receptor complex
11	IGFBP3	IBP3_HUMAN	endoplasmic reticulum lumen,extracellular region,extracellular space,insulin-like growth factor binding protein complex,insulin-like growth factor ternary complex,nucleus
12	IFIT2	IFIT2 (ISG54)_HUMAN	cytoplasm,cytosol,endoplasmic reticulum
13	ERBB2	ERBB2_HUMAN	apical plasma membrane,basal plasma membrane,basolateral plasma membrane,cytosol,early endosome,endosome membrane,ERBB3:ERBB2 complex,integral component of membrane,integral component of plasma membrane,myelin sheath,nucleus,perinuclear region of cytoplasm,plasma membrane,receptor complex,spanning component of plasma membrane
14	IFI6	IFI6_HUMAN	integral component of membrane,mitochondrial inner membrane,mitochondrial membrane,mitochondrion,plasma membrane
15	LCK	LCK_HUMAN	cytosol,extracellular exosome,extrinsic component of cytoplasmic side of plasma membrane,immunological synapse,membrane raft,pericentriolar material,plasma membrane
16	PNPT1	PNPT1_HUMAN	cytoplasm,cytosol,endoplasmic reticulum membrane,mitochondrial degradosome,mitochondrial intermembrane space,mitochondrial matrix,mitochondrion,nucleus,polysomal ribosome
17	PDGFRA/B	PDGF receptor_HUMAN	plasma membrane
18	IGFBP4	IBP4_HUMAN	endoplasmic reticulum lumen,extracellular region,extracellular space
19	TGFBR3	TGFBR3_HUMAN	cell surface,cytoplasm,external side of plasma membrane,extracellular exosome,extracellular matrix,extracellular space,inhibin-betaglycan-ActRII complex,integral component of plasma membrane,receptor complex
20	TGFBI	BGH3_HUMAN	basement membrane,collagen-containing extracellular matrix,extracellular exosome,extracellular matrix,extracellular region,extracellular space,plasma membrane,trans-Golgi network
