# Supplementary material for: Pathway and Network Analyses Identify Growth Factor Signaling and MMP9 as Potential Mediators of Mitochondrial Dysfunction in Severe COVID-19
Source: Int J Mol Sci. 2023 Jan 28;24(3):2524. doi: 10.3390/ijms24032524 (PMC9917147; doi:10.3390/ijms24032524)
Supplement: Supplementary file 1 [file ijms-24-02524-s001.zip › Supplement Datasheet S4_SampleInformation.xlsx]

## Sheet: Table S13
Supplement Datasheet S4. Sample information including technical characteristics and quality of pre-processed sample transcriptome data. Libraries for all samples were prepared using the TruSeq Stranded Total RNA with Ribo-Zero Globin kit and sequenced on the Illumina NovaSeq 6000 as 2 x 150 bp reads. Pre-processing was performed with the RNASeq-DE workflow, available at https://github.com/Sydney-…
Sample identifier	GEO accession	Infection status	WHO severity	Sex	Age	Sequencing batch identifier	Number of raw reads	Number of adaptor and poly A trimmed reads	Uniquely mapped reads (%)	Non primary hits (%)	Reads aligned to CDS (%)	Unmapped reads (%)	Reads explained by "1+-,1-+,2++,2--" (%)
HC22	GSM6730791	Healthy	0	female	47	AGRF_CAGRF20104118_HWYY3DSXY	164077518	163953412	65.19	25.13	32.69	3.63	85.58
HC41	GSM6730792	Healthy	0	female	50.2	AGRF_CAGRF20104118_HWYY3DSXY	170428560	170295766	66.82	23.02	36.79	4.28	86.31
HC43	GSM6730793	Healthy	0	male	47.6	AGRF_CAGRF20104118_HWYY3DSXY	172348246	172220364	75.03	16.85	34.76	3.57	87.45
HC44	GSM6730794	Healthy	0	female	49	AGRF_CAGRF20104118_HWYY3DSXY	164836986	164671714	70.75	20.62	33.78	3.52	86.76
HC47	GSM6730795	Healthy	0	male	53.1	AGRF_CAGRF20104118_HWYY3DSXY	196487088	196208948	71.16	20.25	35.32	3.58	85.98
HC49	GSM6730796	Healthy	0	female	46.7	AGRF_CAGRF20104118_HWYY3DSXY	157107818	157020214	70.13	19.18	33.97	5.75	88.55
HC59	GSM6730797	Healthy	0	male	52.7	AGRF_CAGRF20104118_HWYY3DSXY	176237448	176082152	68.98	21.49	33.93	4.11	87.84
HC76	GSM6730798	Healthy	0	female	51.4	AGRF_CAGRF20104118_HWYY3DSXY	192081498	191926298	71.44	19.56	35.98	3.92	86.84
HC85	GSM6730799	Healthy	0	female	40.6	AGRF_CAGRF20104118_HWYY3DSXY	186354338	186324080	71.97	17.58	32.99	5.6	87.49
HC86	GSM6730800	Healthy	0	female	48.7	AGRF_CAGRF20104118_HWYY3DSXY	213005080	212913100	71.3	20.93	30.47	2.49	83.75
HC94	GSM6730801	Healthy	0	male	48.7	AGRF_CAGRF20104118_HWYY3DSXY	196094784	195979804	73.94	18.07	33.8	3.1	85.68
HC98	GSM6730802	Healthy	0	female	40.6	AGRF_CAGRF20104118_HWYY3DSXY	177333140	177089482	72.99	17.88	30.47	4.59	86.62
HC99	GSM6730803	Healthy	0	male	58.3	AGRF_CAGRF20104118_HWYY3DSXY	159003482	158898092	73.33	17.55	33.76	4.58	90.17
HC100	GSM6730804	Healthy	0	male	55	AGRF_CAGRF20104118_HWYY3DSXY	181690474	181468960	65.52	24.63	30.87	4	87.32
HC107	GSM6730805	Healthy	0	female	44.2	AGRF_CAGRF20104118_HWYY3DSXY	139535150	139444912	73.43	16.62	33.64	5.58	89.32
HC108	GSM6730806	Healthy	0	male	61.1	AGRF_CAGRF20104118_HWYY3DSXY	156982018	156929118	76.72	14.31	34.91	4.77	90.13
HC109	GSM6730807	Healthy	0	female	54.7	AGRF_CAGRF20104118_HWYY3DSXY	228746354	228677040	78.32	11.02	32.39	7.28	85.85
HC113	GSM6730808	Healthy	0	female	43	AGRF_CAGRF20104118_HWYY3DSXY	165091568	165042916	76.67	13.71	32.13	5.62	86.58
HC114	GSM6730809	Healthy	0	male	52.2	AGRF_CAGRF20104118_HWYY3DSXY	195098724	194973912	76.1	15.57	32.4	3.99	89.1
HC115	GSM6730810	Healthy	0	female	48.8	AGRF_CAGRF20104118_HWYY3DSXY	202435528	202261876	71.21	20.19	36.48	3.42	86.33
HC116	GSM6730811	Healthy	0	female	50	AGRF_CAGRF20104118_HWYY3DSXY	158672642	158593202	75.09	14.44	36.4	6.44	89.32
HC117	GSM6730812	Healthy	0	female	50	AGRF_CAGRF20104118_HWYY3DSXY	151600292	151494582	71.86	17.53	31.9	6.05	89.01
HC118	GSM6730813	Healthy	0	female	50.5	AGRF_CAGRF20104118_HWYY3DSXY	172480426	172200926	69.95	19.54	34.04	5.59	87.95
HC119	GSM6730814	Healthy	0	female	47.4	AGRF_CAGRF20104118_HWYY3DSXY	153955588	153841962	70.74	18.24	32.4	6.36	90.86
HC120	GSM6730815	Healthy	0	female	48.7	AGRF_CAGRF20104118_HWYY3DSXY	130103976	130000518	73.94	14.82	36.37	6.92	90.07
HC121	GSM6730816	Healthy	0	female	48.4	AGRF_CAGRF20104118_HWYY3DSXY	160921682	160836396	75.76	14.66	33	5.47	89.1
HC122	GSM6730817	Healthy	0	female	38.4	AGRF_CAGRF20104118_HWYY3DSXY	164733814	164576976	71.51	18.46	32.06	5.09	87.97
HC123	GSM6730818	Healthy	0	male	53.1	AGRF_CAGRF20104118_HWYY3DSXY	226908848	226748254	75.38	15.49	35.31	4.52	83.78
HC124	GSM6730819	Healthy	0	male	47.2	AGRF_CAGRF20104118_HWYY3DSXY	177133022	177076114	78.3	12.14	32.58	5.72	86.1
HC125	GSM6730820	Healthy	0	female	44.2	AGRF_CAGRF20104118_HWYY3DSXY	155605854	155497222	69.91	20.53	32.07	4.56	88.57
HC126	GSM6730821	Healthy	0	female	50	AGRF_CAGRF20104118_HWYY3DSXY	189279668	189149522	68.02	21.53	30.1	5.15	85.65
HC127	GSM6730822	Healthy	0	female	48	AGRF_CAGRF20104118_HWYY3DSXY	175672052	175558464	75.21	15.51	33.01	5.06	88.31
HC128	GSM6730823	Healthy	0	female	44.5	AGRF_CAGRF20104118_HWYY3DSXY	154238230	154172916	71.85	16.15	34	7.74	90.49
HC129	GSM6730824	Healthy	0	male	55.4	AGRF_CAGRF20104118_HWYY3DSXY	169801628	169753754	74.56	15.42	37.29	4.41	88.18
HC130	GSM6730825	Healthy	0	female	43.6	AGRF_CAGRF20104118_HWYY3DSXY	196759992	196637334	71.3	18.57	34.94	4.7	84.67
HC131	GSM6730826	Healthy	0	female	49	AGRF_CAGRF20104118_HY32MDSXY	222684412	222553840	77	12.01	37.66	6.79	88.2
HC132	GSM6730827	Healthy	0	male	57.4	AGRF_CAGRF20104118_HY32MDSXY	172203778	172060046	72.43	16.76	31.72	6.43	87.97
HC133	GSM6730828	Healthy	0	female	40.5	AGRF_CAGRF20104118_HY32MDSXY	179713452	179596972	71.88	17.87	30.98	5.53	85.57
HC134	GSM6730829	Healthy	0	male	50.3	AGRF_CAGRF20104118_HY32MDSXY	229923004	229718908	75.97	13.8	32.73	6.2	85.85
HC135	GSM6730830	Healthy	0	female	48.8	AGRF_CAGRF20104118_HY32MDSXY	177149548	177049382	71.59	18.38	31.45	5.39	88.25
HC136	GSM6730831	Healthy	0	male	51.4	AGRF_CAGRF20104118_HY32MDSXY	195768432	195657382	72.09	17.03	31.42	6.25	82.87
HC137	GSM6730832	Healthy	0	female	42.9	AGRF_CAGRF20104118_HY32MDSXY	166299828	166146860	73.94	14.63	32.13	7.29	87.89
HC138	GSM6730833	Healthy	0	female	41.9	AGRF_CAGRF20104118_HY32MDSXY	163449972	163338586	74.61	12.95	32.27	8.74	89.08
HC139	GSM6730834	Healthy	0	female	44.3	AGRF_CAGRF20104118_H7KFGDSX2	257054860	256649840	72.38	18.41	33.14	4.44	77.29
HC140	GSM6730835	Healthy	0	male	59.9	AGRF_CAGRF20104118_H7KFGDSX2	156166804	155925780	73.32	18.76	31.67	3.15	88.77
HC141	GSM6730836	Healthy	0	male	54.7	AGRF_CAGRF20104118_H7KFGDSX2	138017070	137837582	77.01	14.87	33.36	3.83	90.1
HC142	GSM6730837	Healthy	0	male	58.1	AGRF_CAGRF20104118_H7KFGDSX2	149303916	149080784	73.6	18.04	30.89	3.65	87.92
HC143	GSM6730838	Healthy	0	male	53.3	AGRF_CAGRF20104118_H7KFGDSX2	145405232	144996940	75.37	16.93	34.72	2.95	89.31
HC144	GSM6730839	Healthy	0	male	59.7	AGRF_CAGRF20104118_H7KFGDSX2	143632450	143461274	73.93	17.45	32.11	3.82	89.95
HC145	GSM6730840	Healthy	0	male	52.4	AGRF_CAGRF20104118_H5VMVDSX2	154958172	154790204	75.59	15.6	33.43	4.28	86.19
HC146	GSM6730841	Healthy	0	male	51.8	AGRF_CAGRF20104118_H5VMVDSX2	181121298	180802418	76.54	14.17	33.17	5.2	87.67
HC147	GSM6730842	Healthy	0	male	59.5	AGRF_CAGRF20104118_H5VMVDSX2	146747132	146628040	74.03	16.94	34.71	4.39	89.49
HC148	GSM6730843	Healthy	0	male	56.3	AGRF_CAGRF20104118_H5VMVDSX2	132882826	132758724	73.78	16.3	36.02	5.11	90.98
HC149	GSM6730844	Healthy	0	male	55.5	AGRF_CAGRF20104118_H5VMVDSX2	136804246	136669894	75.01	15.97	32.6	4.59	88.96
HC150	GSM6730845	Healthy	0	male	58.8	AGRF_CAGRF20104118_H7KF2DSX2	139570186	139019440	79.51	13.79	32.54	2.68	88.49
HC151	GSM6730846	Healthy	0	male	60.5	AGRF_CAGRF20104118_H7KF2DSX2	161249202	160803004	80.56	12.89	30.27	2.76	87.28
HC152	GSM6730847	Healthy	0	male	53	AGRF_CAGRF20104118_H7KF2DSX2	186019284	185229744	75.4	17.05	32.73	2.65	85.86
HC153	GSM6730848	Healthy	0	female	43.3	AGRF_CAGRF20104118_H7KF2DSX2	631600396	629666412	75.92	16.73	30.96	2.75	84.18
HC154	GSM6730849	Healthy	0	male	55.5	AGRF_CAGRF20104118_H7KF2DSX2	172054054	171461260	73.65	18.95	28.36	2.42	86.7
HC155	GSM6730850	Healthy	0	female	53.1	AGRF_CAGRF20104118_H7KF2DSX2	160942336	160083904	75.48	16.77	36.02	2.83	87.94
HC156	GSM6730851	Healthy	0	female	50.3	AGRF_CAGRF20104118_H7KF2DSX2	175318004	174962560	76.92	15.64	36.88	2.85	89.08
HC157	GSM6730852	Healthy	0	female	52.7	AGRF_CAGRF20104118_H7KF2DSX2	169627758	169179970	81.43	12.03	32.71	2.89	87.8
HC158	GSM6730853	Healthy	0	male	38.5	AGRF_CAGRF20104118_H7KF2DSX2	121937462	121371452	69.35	22.06	33.05	2.96	90.06
HC159	GSM6730854	Healthy	0	male	31.8	AGRF_CAGRF20104118_H7KF2DSX2	192142968	190946762	74.39	18.06	31.8	2.83	83.11
HC160	GSM6730855	Healthy	0	male	30.4	AGRF_CAGRF20104118_HLHFGDSX2_retrieval	212447436	212272178	70.82	17.08	36.4	7.43	86.41
HC161	GSM6730856	Healthy	0	male	61.1	AGRF_CAGRF20104118_HLHFGDSX2_retrieval	197571858	197467280	73.98	15.74	39.37	5.85	88.11
HC162	GSM6730857	Healthy	0	female	55.1	AGRF_CAGRF20104118_HLHFGDSX2_retrieval	205728996	205704316	82.2	9.11	32.87	5.85	84.96
HC163	GSM6730858	Healthy	0	male	38.5	AGRF_CAGRF20104118_HLHFGDSX2_retrieval	184872554	184763820	83.07	9.6	32.85	4.33	83.98
HC046	GSM6730859	Healthy	0	male	24.9	AGRF_CAGRF20104118_HWKMTDSX2	210935284	210159706	73.71	14.89	39.45	6.98	79.25
HC105	GSM6730860	Healthy	0	male	37.9	AGRF_CAGRF20104118_HWKMTDSX2	136970858	136652950	74.39	14.89	35.3	6.26	85.43
HC110	GSM6730861	Healthy	0	male	38.3	AGRF_CAGRF20104118_HWKMTDSX2	144724258	144542564	76.98	14.37	34.91	4.37	83.88
nCWES001d1	GSM6730862	COVID	4	male	43	AGRF_CAGRF20104118_HLGVCDSX2	173049848	172690952	71.53	18.59	32.27	4.98	85.95
nCWES006d1	GSM6730867	COVID	4	female	51	AGRF_CAGRF20104118_HLGVCDSX2	206222824	206026570	79.13	10.29	31.14	7.46	84.76
nCWES007d1	GSM6730874	COVID	7	male	53	AGRF_CAGRF20104118_HLGVCDSX2	179143226	178952456	79.09	11.66	32.6	5.76	89.93
nCWES008d1	GSM6730882	COVID	4	male	31	AGRF_CAGRF20104118_HLGVCDSX2	178791332	178569694	68.76	20.54	35.96	5.74	88.47
nCWES009d1	GSM6730888	COVID	4	female	41	AGRF_CAGRF20104118_HLGVCDSX2	151565546	151327608	66.87	21.89	31.8	5.89	88.49
nCWES010d1	GSM6730893	COVID	4	male	38	AGRF_CAGRF20104118_HLGVCDSX2	151412226	151175002	69.72	18.93	34.95	6.37	83.57
nCWES012d1	GSM6730898	COVID	4	male	53	AGRF_CAGRF20104118_HLGVCDSX2	149942678	149394910	71.94	15.72	33.59	8.1	89.59
nCWES013d1	GSM6730903	COVID	4	male	39	AGRF_CAGRF20104118_HLGVCDSX2	197712030	197302054	68.76	19.61	33.09	6.71	86.21
nCWES015d1	GSM6730908	COVID	4	female	78	AGRF_CAGRF20104118_HLGVCDSX2	138693900	138435462	74.25	15.07	33.13	6.59	89.13
nCWES018d1	GSM6730914	COVID	4	male	72	AGRF_CAGRF20104118_HLGVCDSX2	158857554	158403386	67.18	21.02	33.86	6.82	86.94
nCWES026d1	GSM6730921	COVID	4	female	55	AGRF_CAGRF20104118_HLHFGDSX2_retrieval	187346720	186877964	71.24	18.5	35.1	5.89	86.11
nCWES029d1	GSM6730930	COVID	3	female	38	AGRF_CAGRF20104118_HLHFGDSX2_retrieval	193447040	193129578	72	17.27	33.38	6.47	89.58
nCWES040d1	GSM6730933	COVID	4	female	43	AGRF_CAGRF20104118_HLHFGDSX2_retrieval	192988148	192720226	72.1	17.51	33.05	5.89	91.07
nCWES044d1	GSM6730938	COVID	4	male	65	AGRF_CAGRF20104118_HLHFGDSX2_retrieval	226168060	225947124	76.7	14.26	35	5.14	88.89
nCWES052d1	GSM6730946	COVID	5	female	56	AGRF_CAGRF20104118_HLHFGDSX2_retrieval	202675108	202373236	75.91	15.06	35.04	5.11	85.47
nCWES057d1	GSM6730951	COVID	4	male	80	AGRF_CAGRF20104118_HLHFGDSX2_retrieval	191818756	191647928	77.65	14.61	35.69	3.72	86.25
nCWES058d1	GSM6730954	COVID	5	male	76	AGRF_CAGRF20104118_HLHFGDSX2_retrieval	153497782	153198620	83.07	9.25	32.35	4.74	89.45
nCWES061d1	GSM6730960	COVID	4	male	71	AGRF_CAGRF20104118_HLHFGDSX2_retrieval	200726556	200638682	70.12	20.66	34.49	4.2	86.34
nWES005d2	GSM6730966	COVID	4	male	43	AGRF_CAGRF20104118_HLGVCDSX2	176576168	176390416	60.82	28.04	34.72	4.94	88.25
nCNE001	GSM6730974	COVID	9	female	60	AGRF_CAGRF20104118_HWYY3DSXY	140081142	140020390	76.41	16.12	33.07	3.25	92.84
nCNE005d1	GSM6730975	COVID	4	male	64	AGRF_CAGRF20104118_HWYY3DSXY	143592118	143460778	75.05	16.74	35.87	3.77	90.59
nCNE010d1	GSM6730978	COVID	5	female	62	AGRF_CAGRF20104118_HWYY3DSXY	170366526	170275854	77.08	13.57	32.62	5.43	91.42
nCNE011d1	GSM6730981	COVID	5	male	76	AGRF_CAGRF20104118_HWYY3DSXY	147524030	147462056	76.05	16.5	31.07	2.88	90.37
nCNE012d1	GSM6730984	COVID	4	female	60	AGRF_CAGRF20104118_HWYY3DSXY	189923534	189171834	61.5	28.62	35.7	3.4	85.24
nCRPE001d1	GSM6730986	COVID	5	male	45	AGRF_CAGRF20104118_HLHFGDSX2_retrieval	159129742	159045620	80.46	11.84	32.13	4.23	89.42
nCMEL020	GSM6730988	COVID	4	male	59	AGRF_CAGRF20104118_HLHFGDSX2_retrieval	169380402	169185338	78.46	11.9	35.81	6.31	91.89
nCMEL022	GSM6730989	COVID	6	female	69	AGRF_CAGRF20104118_HLHFGDSX2_retrieval	171466726	171444608	64.59	23.19	48.46	4.72	90.3
nCMEL023	GSM6730990	COVID	4	male	41	AGRF_CAGRF20104118_HLHFGDSX2_retrieval	175292814	175242460	77.65	13.15	42.29	5.39	89.34
nCMEL024	GSM6730991	COVID	6	female	72	AGRF_CAGRF20104118_HLHFGDSX2_retrieval	195526144	195427832	71.92	18.88	45.14	4.27	87.89
nCMEL025	GSM6730992	COVID	4	female	55	AGRF_CAGRF20104118_HLHFGDSX2_retrieval	173400654	173210878	75.12	15.94	36.31	4.53	88.25
nCMEL026	GSM6730993	COVID	6	male	40	AGRF_CAGRF20104118_HLHFGDSX2_retrieval	152125810	152009848	82.63	9.64	36.42	4.41	91.68
nCMEL027	GSM6730994	COVID	4	male	73	AGRF_CAGRF20104118_HLHFGDSX2_retrieval	206604416	206544890	74.58	16.06	33.12	4.96	83.61
nCMEL028	GSM6730995	COVID	6	female	24	AGRF_CAGRF20104118_HLHFGDSX2_retrieval	226003414	225453698	76.04	15.26	36.13	4.51	85.66
nCMEL029	GSM6730996	COVID	9	male	57	AGRF_CAGRF20104118_HLHFGDSX2_retrieval	182469762	182358532	73.2	16.81	34.46	5.49	88.23
nCCZ001	GSM6730997	COVID	4	female	44	AGRF_CAGRF20104118_H7KF2DSX2	217146188	216091376	77.88	15.2	31.92	2.76	82.29
nCCZ002	GSM6730998	COVID	5	female	80	AGRF_CAGRF20104118_H7KF2DSX2	122584756	122157666	79.27	13.98	31.9	2.67	89.85
nCCZ003	GSM6730999	COVID	5	male	48	AGRF_CAGRF20104118_H7KF2DSX2	140901012	140108322	70.78	21.23	31.3	2.8	89.21
nCCZ004	GSM6731000	COVID	4	female	47	AGRF_CAGRF20104118_H7KF2DSX2	135298572	134419262	64.12	26.93	31.51	2.5	87.29
nCCZ005	GSM6731001	COVID	4	female	61	AGRF_CAGRF20104118_H7KF2DSX2	134380922	133833946	67.48	24.11	29.69	2.39	87.11
nCCZ006	GSM6731002	COVID	5	male	83	AGRF_CAGRF20104118_H7KF2DSX2	133028250	131891688	82.51	11.13	37.1	2.49	93.76
nCCZ007	GSM6731003	COVID	5	male	85	AGRF_CAGRF20104118_H7KF2DSX2	158088400	157610618	78.63	14.74	29.77	2.62	87.61
nCCZ008	GSM6731004	COVID	5	male	59	AGRF_CAGRF20104118_H7KF2DSX2	164015448	162238426	58.34	29.36	47.3	2.97	86.7
nCCZ009	GSM6731005	COVID	5	female	65	AGRF_CAGRF20104118_H7KF2DSX2	159881554	159126924	60.56	29.97	39.53	2.5	84.89
nCCZ010	GSM6731006	COVID	5	female	66	AGRF_CAGRF20104118_H7KF2DSX2	201891808	200829706	70.66	20.71	33.97	3.03	83.88
nCCZ011	GSM6731007	COVID	5	male	40	AGRF_CAGRF20104118_H7KF2DSX2	260199490	258942562	80.09	12	37.52	3.57	91.67
nCCZ012	GSM6731008	COVID	4	male	84	AGRF_CAGRF20104118_H7KF2DSX2	142705590	142030054	71.49	19.49	34.88	3.31	89.02
nCCZ014	GSM6731009	COVID	6	female	82	AGRF_CAGRF20104118_H7KF2DSX2	144027994	142900520	63.04	27.11	34.95	3.14	87.79
nCCZ015	GSM6731010	COVID	5	male	69	AGRF_CAGRF20104118_H7KF2DSX2	129643900	129318596	79.36	13.04	33.39	3.72	92.87
nCCZ016	GSM6731011	COVID	5	female	77	AGRF_CAGRF20104118_H7KF2DSX2	134324762	133364086	71.24	20.06	35.14	2.79	90.45
nCCZ017	GSM6731012	COVID	7	male	74	AGRF_CAGRF20104118_H7KF2DSX2	133962644	131975732	74.82	16.12	47.11	2.72	94.02
nCCZ018	GSM6731013	COVID	5	male	54	AGRF_CAGRF20104118_H7KF2DSX2	250896934	237070104	24.59	56.63	28.76	5.94	87.31
nCCZ019	GSM6731014	COVID	5	female	84	AGRF_CAGRF20104118_H7KF2DSX2	223837004	222105088	71.91	20.01	35.2	2.7	78.5
nCCZ020	GSM6731015	COVID	4	male	51	AGRF_CAGRF20104118_H7KF2DSX2	176248324	174975138	73.26	18.99	34.42	2.68	87.42
nCCZ021	GSM6731016	COVID	5	male	52	AGRF_CAGRF20104118_H7KF2DSX2	190586822	189591016	77.12	15.66	33.03	2.85	87.66
nCCZ022	GSM6731017	COVID	5	male	89	AGRF_CAGRF20104118_H7KF2DSX2	133806260	132923886	63.87	26.93	31.01	2.66	87.96
nCCZ023	GSM6731018	COVID	5	male	79	AGRF_CAGRF20104118_H7KF2DSX2	174706460	173769084	69.82	21.66	34.26	2.67	88.52
nCCZ024	GSM6731019	COVID	4	male	89	AGRF_CAGRF20104118_H7KF2DSX2	151496308	151083012	77.57	15.21	33.58	2.92	91.71
nCCZ025	GSM6731020	COVID	5	male	82	AGRF_CAGRF20104118_H7KF2DSX2	147854946	146148256	72.05	18.72	38.61	3.21	94.12
nCCZ026	GSM6731021	COVID	4	female	82	AGRF_CAGRF20104118_H7KF2DSX2	219841890	218456090	79.94	13.07	39.22	2.55	93.64
nCCZ027	GSM6731022	COVID	6	male	65	AGRF_CAGRF20104118_H7KF2DSX2	150466262	148764662	75.27	17.12	33.72	2.59	91.74
nCCZ028	GSM6731023	COVID	4	male	74	AGRF_CAGRF20104118_H7KF2DSX2	145366126	144901156	74.3	18.31	31.98	2.47	89.3
nCCZ029	GSM6731024	COVID	5	male	40	AGRF_CAGRF20104118_H7KF2DSX2	168443220	167881034	72.26	20.1	33.74	2.35	78.96
nCCZ030	GSM6731025	COVID	4	female	67	AGRF_CAGRF20104118_H7KF2DSX2	167588764	166557142	76.18	16.24	36.33	2.75	93.4
nCCZ031	GSM6731026	COVID	5	male	70	AGRF_CAGRF20104118_H7KF2DSX2	169722886	168776370	67.06	24.2	33.68	2.56	89.03
nCCZ032	GSM6731027	COVID	4	male	68	AGRF_CAGRF20104118_H7KF2DSX2	213002492	211819630	66.59	24.64	32.25	2.79	81.65
nCCZ033	GSM6731028	COVID	4	male	52	AGRF_CAGRF20104118_H7KF2DSX2	113429632	112518596	78.31	14.52	35.6	2.82	91.35
nCCZ035	GSM6731029	COVID	4	male	80	AGRF_CAGRF20104118_H7KF2DSX2	192722198	191779786	66.65	24.86	29.07	2.48	88.04
nCCZ036	GSM6731030	COVID	4	female	80	AGRF_CAGRF20104118_H7KF2DSX2	174796972	174087234	73.36	18.91	30.38	2.43	83.82
nCCZ037	GSM6731031	COVID	5	male	74	AGRF_CAGRF20104118_H7KF2DSX2	185780192	184983956	79.81	13.5	32.67	2.64	91.32
nCCZ038d1	GSM6731032	COVID	7	male	62	AGRF_CAGRF20104118_H7KF2DSX2	140838340	139751804	76.02	16.67	36.93	2.48	93.53
nCCZ039d1	GSM6731034	COVID	6	male	66	AGRF_CAGRF20104118_H7KF2DSX2	202964528	201666012	82.95	10.65	37.24	2.65	89.98
nCCZ040d1	GSM6731035	COVID	7	male	79	AGRF_CAGRF20104118_H7KF2DSX2	160023560	159471332	68.8	22.71	36.24	2.78	92.71
nCCZ041	GSM6731037	COVID	7	male	62	AGRF_CAGRF20104118_H7KF2DSX2	197789276	196812504	77.55	15.38	37.01	2.56	89.37
nCCZ042d1	GSM6731038	COVID	7	male	52	AGRF_CAGRF20104118_H7KF2DSX2	206995724	206221474	76.48	15.94	37.63	2.8	91.36
nCCZ043d1	GSM6731040	COVID	7	female	70	AGRF_CAGRF20104118_H7KF2DSX2	234147662	233251210	74.37	17.78	35.96	2.97	91.2
nCCZ044d1	GSM6731042	COVID	9	male	69	AGRF_CAGRF20104118_H7KF2DSX2	204401886	203225616	76.64	15.74	36.36	2.87	91.59
nCCZ045d1	GSM6731044	COVID	7	male	59	AGRF_CAGRF20104118_H7KF2DSX2	149012142	148646056	77.31	14.79	35.15	3.47	91.56
nCCZ046	GSM6731046	COVID	6	female	27	AGRF_CAGRF20104118_H7KF2DSX2	96674608	96104764	62.44	28.36	32.03	2.77	91.92
nCCZ047d1	GSM6731047	COVID	9	female	56	AGRF_CAGRF20104118_H7KF2DSX2	125527266	125064096	65.88	24.92	37.32	3.13	90.63
nCCZ048	GSM6731049	COVID	9	male	67	AGRF_CAGRF20104118_H7KF2DSX2	154257962	153752052	73.18	18.6	33.27	3.22	92.21
nCCZ049d1	GSM6731050	COVID	9	male	57	AGRF_CAGRF20104118_H7KF2DSX2	182249996	181402510	76.56	15.62	35.11	3.35	92.67
nCCZ050	GSM6731052	COVID	6	male	74	AGRF_CAGRF20104118_H7KF2DSX2	178046648	177578634	77.52	14.24	37.24	3.22	91.17
nCCZ051d1	GSM6731053	COVID	9	male	42	AGRF_CAGRF20104118_H7KF2DSX2	111114868	110612900	62.79	26.8	37.67	3.57	92.57
nCCZ052d1	GSM6731055	COVID	7	male	49	AGRF_CAGRF20104118_H7KF2DSX2	153621400	153205962	76.11	16.07	35.16	3.17	91.11
nCCZ053d1	GSM6731057	COVID	9	female	54	AGRF_CAGRF20104118_H7KF2DSX2	159738820	158942720	66.35	23.33	41.82	3.36	91.98
nCCZ054d1	GSM6731059	COVID	9	male	46	AGRF_CAGRF20104118_H7KF2DSX2	345967664	345012474	67.7	23.18	35.98	3.62	87.98
nCCZ055d1	GSM6731061	COVID	9	female	50	AGRF_CAGRF20104118_H7KF2DSX2	122294484	121934332	74.88	16.57	38.63	3.38	91.98
nCCZ056d1	GSM6731063	COVID	7	female	48	AGRF_CAGRF20104118_H7KF2DSX2	157975666	157465486	76.57	15.5	35.8	3.34	90.22
